# Supplementary material for: Base-promoted perfluoroalkylation of rhodium(iii) porphyrin complexes
Source: Royal Society of Chemistry journal article supplement (doi:10.1039/d1dt01118a), 2021-01-01

## Supporting Information

### Base-promoted perfluoroalkylation of rhodium(III) porphyrin complexes

*Li-Jie Fu, Bo-Hsun An, Chih-Hsuan Chou, Chi-Min Chen and Ching Tat To\**

*Department of Chemistry, Tunghai University, No. 1727, Sec. 4, Taiwan Boulevard,  
Xitun District, Taichung City 407224, Taiwan, Republic of China*

*Email: [ctto@go.thu.edu.tw](mailto:ctto@go.thu.edu.tw)*

#### Table of Contents

|                                    |        |
|------------------------------------|--------|
| Supplementary Optimization Results | p. S2  |
| Competition Experiment             | p. S3  |
| X-Ray Diffraction Data             | p. S5  |
| NMR Spectra                        | p. S7  |
| MS Spectra                         | p. S17 |
| GCMS Spectra                       | p. S26 |

## Supplementary Optimization Results

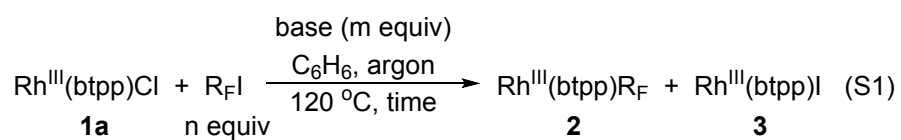

| entry | R <sub>F</sub> I                              | base                           | n  | m  | time / h | yield / %        |          |
|-------|-----------------------------------------------|--------------------------------|----|----|----------|------------------|----------|
|       |                                               |                                |    |    |          | <b>2</b>         | <b>3</b> |
| 1     | <sup>n</sup> C <sub>6</sub> F <sub>13</sub> I | K <sub>3</sub> PO <sub>4</sub> | 15 | 10 | 10.5     | 31 ( <b>2e</b> ) | 21       |
| 2     |                                               |                                | 15 | 15 | 10.5     | 43 ( <b>2e</b> ) | 43       |
| 3     |                                               |                                | 20 | 10 | 10.5     | 42 ( <b>2e</b> ) | 49       |
| 4     |                                               | KOH                            | 15 | 10 | 8        | 27 ( <b>2e</b> ) | 32       |
| 5     |                                               |                                | 20 | 10 | 8        | 75 ( <b>2e</b> ) | 0        |
| 6     | <sup>c</sup> C <sub>6</sub> F <sub>11</sub> I | KOH                            | 15 | 10 | 8        | 40 ( <b>2b</b> ) | 36       |

## Competition Experiment

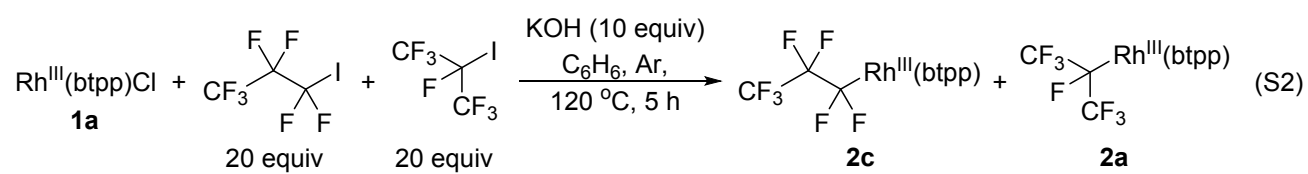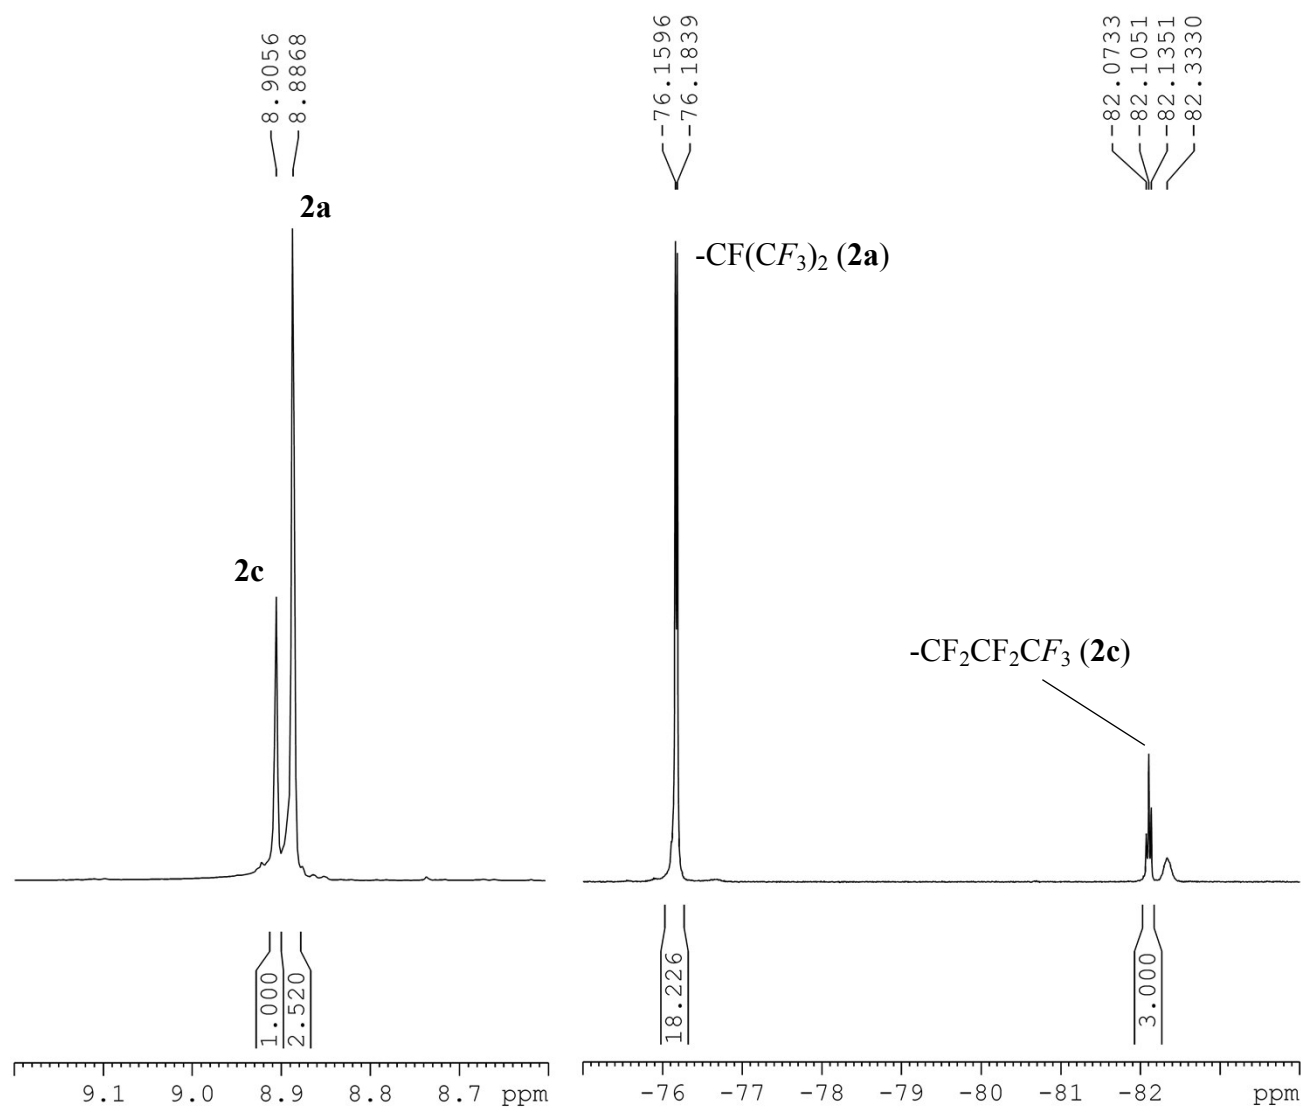

Figure S1. Expanded  $^1\text{H}$  NMR (pyrrolic proton) and  $^{19}\text{F}$  NMR spectra of isolated mixture of **2a** and **2c** (trial 1).

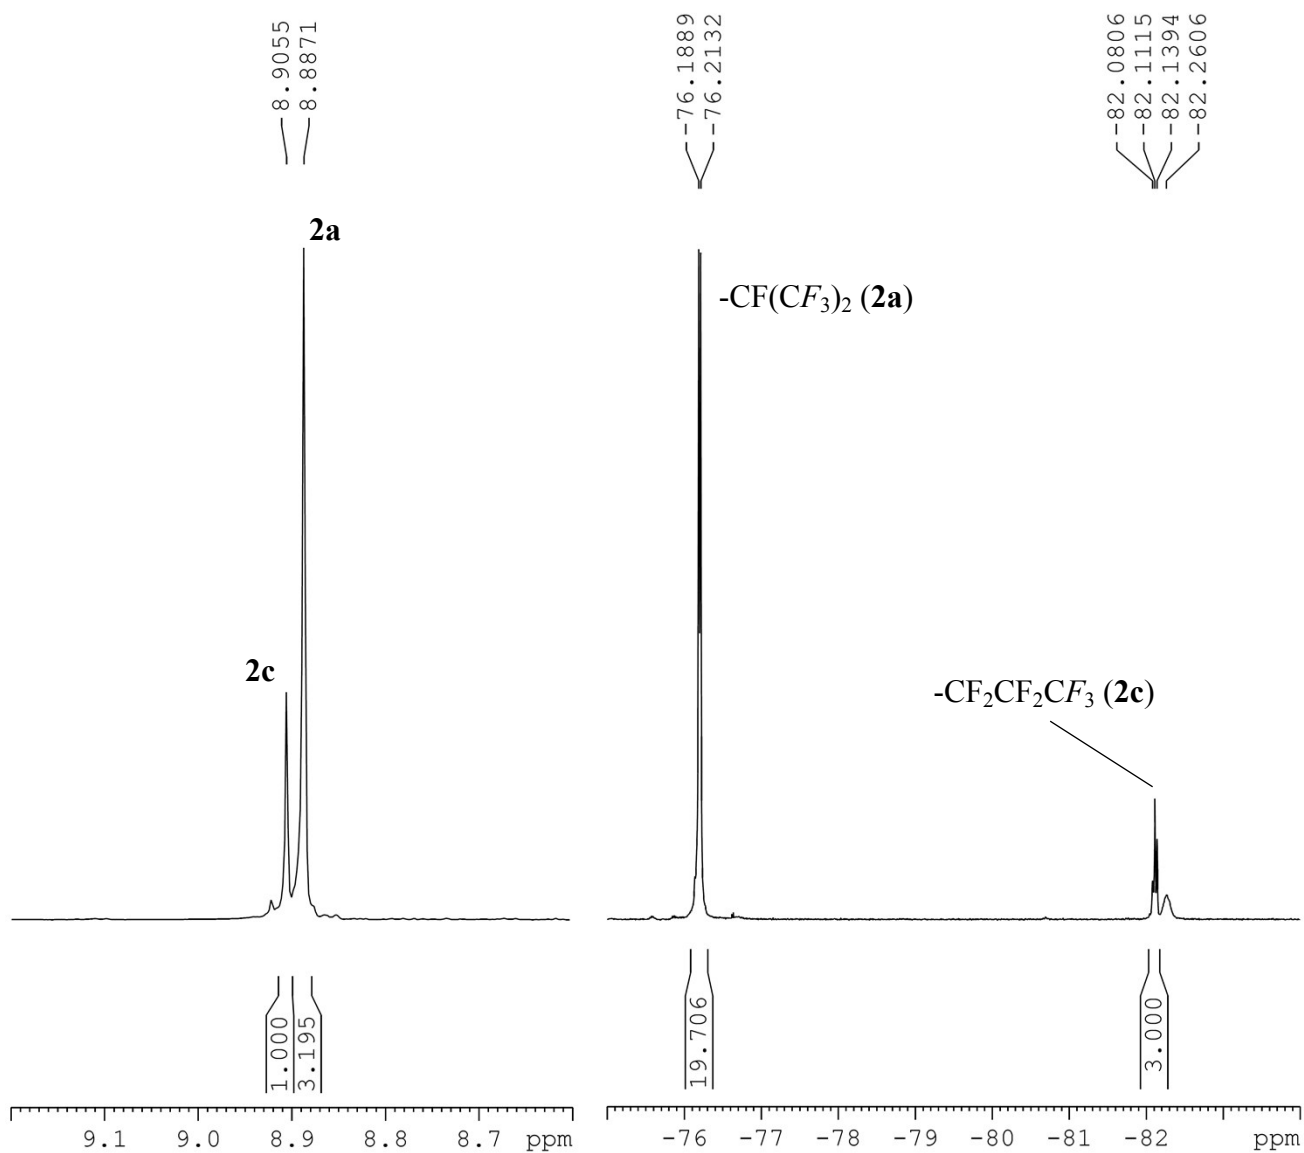

Figure S2. Expanded  $^1\text{H}$  NMR (pyrrolic proton) and  $^{19}\text{F}$  NMR spectra of isolated mixture of **2a** and **2c** (trial 2).

Averaged **2c** : **2a** ratio from  $^1\text{H}$  NMR =  $(2.525+3.195)/2 = 2.86 : 1$

Averaged **2c** : **2a** ratio from  $^{19}\text{F}$  NMR =  $[(18.226+19.706)/4]/3 = 3.16 : 1$

## X-Ray Diffraction Data

| Compound                          | Rh <sup>III</sup> (btp <sup>p</sup> ) <sup>n</sup> C <sub>3</sub> F <sub>7</sub> ·MeOH <b>2a</b> | Rh <sup>III</sup> (btp <sup>p</sup> ) <sup>n</sup> C <sub>3</sub> F <sub>7</sub> ·MeOH <b>2c</b>     |
|-----------------------------------|--------------------------------------------------------------------------------------------------|------------------------------------------------------------------------------------------------------|
| Empirical formula                 | C <sub>64</sub> H <sub>64</sub> F <sub>7</sub> N <sub>4</sub> ORh                                | C <sub>65</sub> H <sub>65.3</sub> Cl <sub>3</sub> F <sub>7</sub> N <sub>4</sub> O <sub>1.15</sub> Rh |
| Formula weight                    | 1141.10                                                                                          | 1263.17                                                                                              |
| Temperature                       | 150(2) K                                                                                         | 150(2) K                                                                                             |
| Wavelength                        | 0.71073 Å                                                                                        | 0.71073 Å                                                                                            |
| Crystal system                    | monoclinic                                                                                       | monoclinic                                                                                           |
| Space group                       | C2/c                                                                                             | P21/c                                                                                                |
| Unit cell dimensions              | a = 29.171(5) Å    α = 90°<br>b = 10.6913(18) Å    β = 110.572(9)°<br>c = 21.741(3) Å    γ = 90° | a = 14.8018(8) Å    α = 90°<br>b = 29.3344(15) Å    β = 107.663(2)°<br>c = 14.4537(7) Å    γ = 90°   |
| Volume                            | 6348.3(18) Å <sup>3</sup>                                                                        | 5979.9(5) Å <sup>3</sup>                                                                             |
| Z                                 | 4                                                                                                | 4                                                                                                    |
| Density (calculated)              | 1.194 g/cm <sup>3</sup>                                                                          | 1.403 g/cm <sup>3</sup>                                                                              |
| Absorption coefficient            | 0.330 mm <sup>-1</sup>                                                                           | 0.488 mm <sup>-1</sup>                                                                               |
| F(000)                            | 2368                                                                                             | 2606                                                                                                 |
| Crystal size                      | 0.560 x 0.280 x 0.130 mm <sup>3</sup>                                                            | 0.560 x 0.350 x 0.120 mm <sup>3</sup>                                                                |
| Theta range for data collection   | 2.390 to 28.107°                                                                                 | 2.460 to 28.004°                                                                                     |
| Limiting indices                  | -38 ≤ h ≤ 38<br>-14 ≤ k ≤ 14<br>-28 ≤ l ≤ 26                                                     | -19 ≤ h ≤ 19<br>-38 ≤ k ≤ 38<br>-19 ≤ l ≤ 19                                                         |
| Reflections collected             | 50400                                                                                            | 13323                                                                                                |
| Independent reflections           | 14779 [R(int) = 0.0763]                                                                          | 13323 [R(int) = 0]                                                                                   |
| Completeness to theta = 25.242°   | 99.7%                                                                                            | 92.2%                                                                                                |
| Absorption correction             | Semi-empirical from equivalents                                                                  | Multi-scan                                                                                           |
| Max. and min. transmission        | 0.9281 and 0.6753                                                                                | 0.7456 and 0.6262                                                                                    |
| Refinement method                 | Full-matrix least-squares on F <sup>2</sup>                                                      | Full-matrix least-squares on F <sup>2</sup>                                                          |
| Data / restraints / parameters    | 14779 / 33 / 709                                                                                 | 13323 / 3 / 744                                                                                      |
| Goodness-of fit on F <sup>2</sup> | 1.053                                                                                            | 0.962                                                                                                |
| Final R indices [I > 2σ(I)]       | R1 = 0.0961, wR2 = 0.2483                                                                        | R1 = 0.0674, wR2 = 0.1916                                                                            |
| R indices (all data)              | R1 = 0.1325, wR2 = 0.2857                                                                        | R1 = 0.0890, wR2 = 0.2062                                                                            |

|                              |                                   |                                   |
|------------------------------|-----------------------------------|-----------------------------------|
| Absolute structure parameter | 0.27(8)                           | --                                |
| Extinction coefficient       | n/a                               | n/a                               |
| Largest diff. peak and hole  | 1.187 and -1.440e.Å <sup>-3</sup> | 1.674 and -1.312e.Å <sup>-3</sup> |

## NMR Spectra

| No. | Spectra                                                                                                                   | Page |
|-----|---------------------------------------------------------------------------------------------------------------------------|------|
| 1   | $^1\text{H}$ NMR Spectrum of $\text{Rh}^{\text{III}}(\text{btp})^i\text{C}_3\text{F}_7$ <b>2a</b>                         | S8   |
| 2   | $^{19}\text{F}$ NMR Spectrum of $\text{Rh}^{\text{III}}(\text{btp})^i\text{C}_3\text{F}_7$ <b>2a</b>                      | S8   |
| 3   | $^1\text{H}$ NMR Spectrum of $\text{Rh}^{\text{III}}(\text{btp})^c\text{C}_6\text{F}_{11}$ <b>2b</b>                      | S9   |
| 4   | $^{19}\text{F}$ NMR Spectrum of $\text{Rh}^{\text{III}}(\text{btp})^c\text{C}_6\text{F}_{11}$ <b>2b</b>                   | S9   |
| 5   | $^1\text{H}$ NMR Spectrum of $\text{Rh}^{\text{III}}(\text{btp})^n\text{C}_3\text{F}_7$ <b>2c</b>                         | S10  |
| 6   | $^{19}\text{F}$ NMR Spectrum of $\text{Rh}^{\text{III}}(\text{btp})^n\text{C}_3\text{F}_7$ <b>2c</b>                      | S10  |
| 7   | $^1\text{H}$ NMR Spectrum of $\text{Rh}^{\text{III}}(\text{btp})^n\text{C}_4\text{F}_9$ <b>2d</b>                         | S11  |
| 8   | $^{19}\text{F}$ NMR Spectrum of $\text{Rh}^{\text{III}}(\text{btp})^n\text{C}_4\text{F}_9$ <b>2d</b>                      | S11  |
| 9   | $^1\text{H}$ NMR Spectrum of $\text{Rh}^{\text{III}}(\text{btp})^n\text{C}_6\text{F}_{13}$ <b>2e</b>                      | S12  |
| 10  | $^{19}\text{F}$ NMR Spectrum of $\text{Rh}^{\text{III}}(\text{btp})^n\text{C}_6\text{F}_{13}$ <b>2e</b>                   | S12  |
| 11  | $^1\text{H}$ NMR Spectrum of $\text{Rh}^{\text{III}}(\text{btp})^n\text{C}_{10}\text{F}_{21}$ <b>2f</b>                   | S13  |
| 12  | $^{19}\text{F}$ NMR Spectrum of $\text{Rh}^{\text{III}}(\text{btp})^n\text{C}_{10}\text{F}_{21}$ <b>2f</b>                | S13  |
| 13  | $^1\text{H}$ NMR Spectrum of $\text{Rh}^{\text{III}}(\text{btp})\text{CF}_2\text{C}_6\text{F}_5$ <b>2g</b>                | S14  |
| 14  | $^{19}\text{F}$ NMR Spectrum of $\text{Rh}^{\text{III}}(\text{btp})\text{CF}_2\text{C}_6\text{F}_5$ <b>2g</b>             | S14  |
| 15  | $^1\text{H}$ NMR Spectrum of $\text{Rh}^{\text{III}}(\text{tp})^i\text{C}_3\text{F}_7$ <b>4a</b>                          | S15  |
| 16  | $^{19}\text{F}$ NMR Spectrum of $\text{Rh}^{\text{III}}(\text{tp})^i\text{C}_3\text{F}_7$ <b>4a</b>                       | S15  |
| 17  | $^1\text{H}$ NMR Spectrum of $\text{Rh}^{\text{III}}(\text{t}_4\text{-CF}_3\text{pp})^i\text{C}_3\text{F}_7$ <b>5a</b>    | S16  |
| 18  | $^{19}\text{F}$ NMR Spectrum of $\text{Rh}^{\text{III}}(\text{t}_4\text{-CF}_3\text{pp})^i\text{C}_3\text{F}_7$ <b>5a</b> | S16  |

<sup>1</sup>H NMR Spectrum of Rh<sup>III</sup>(btp)<sup>i</sup>C<sub>3</sub>F<sub>7</sub> **2a**

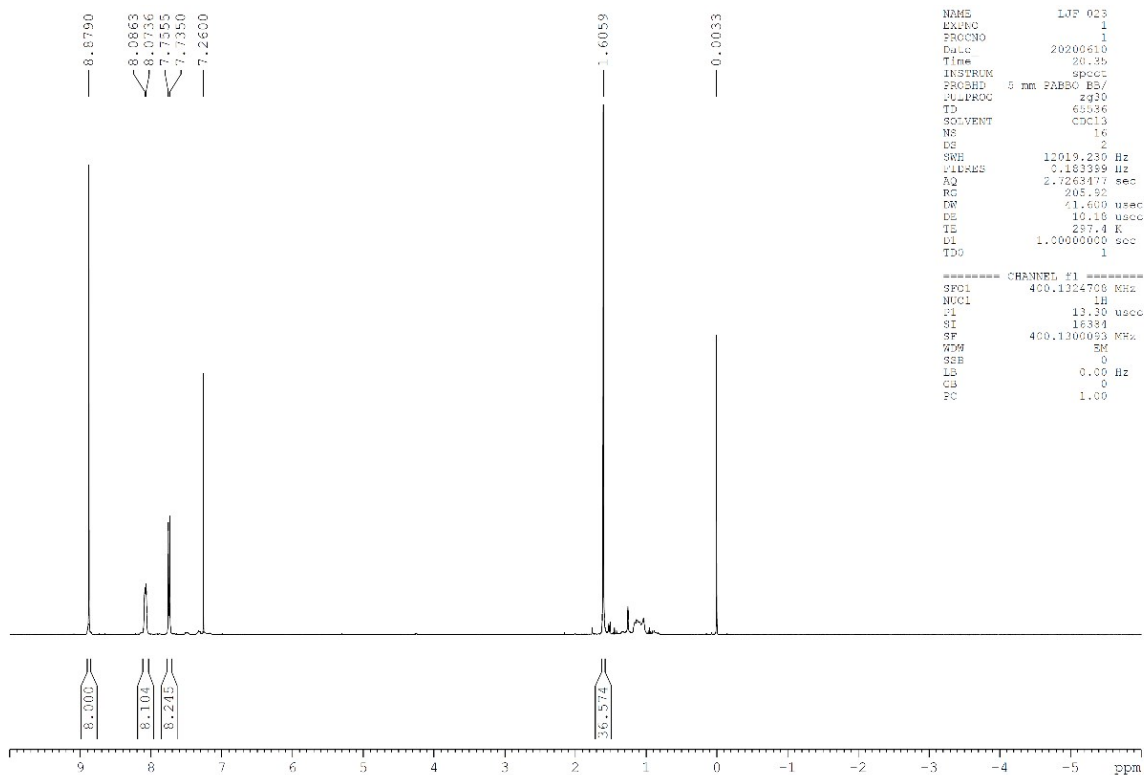

<sup>19</sup>F NMR Spectrum of Rh<sup>III</sup>(btp)<sup>i</sup>C<sub>3</sub>F<sub>7</sub> **2a**

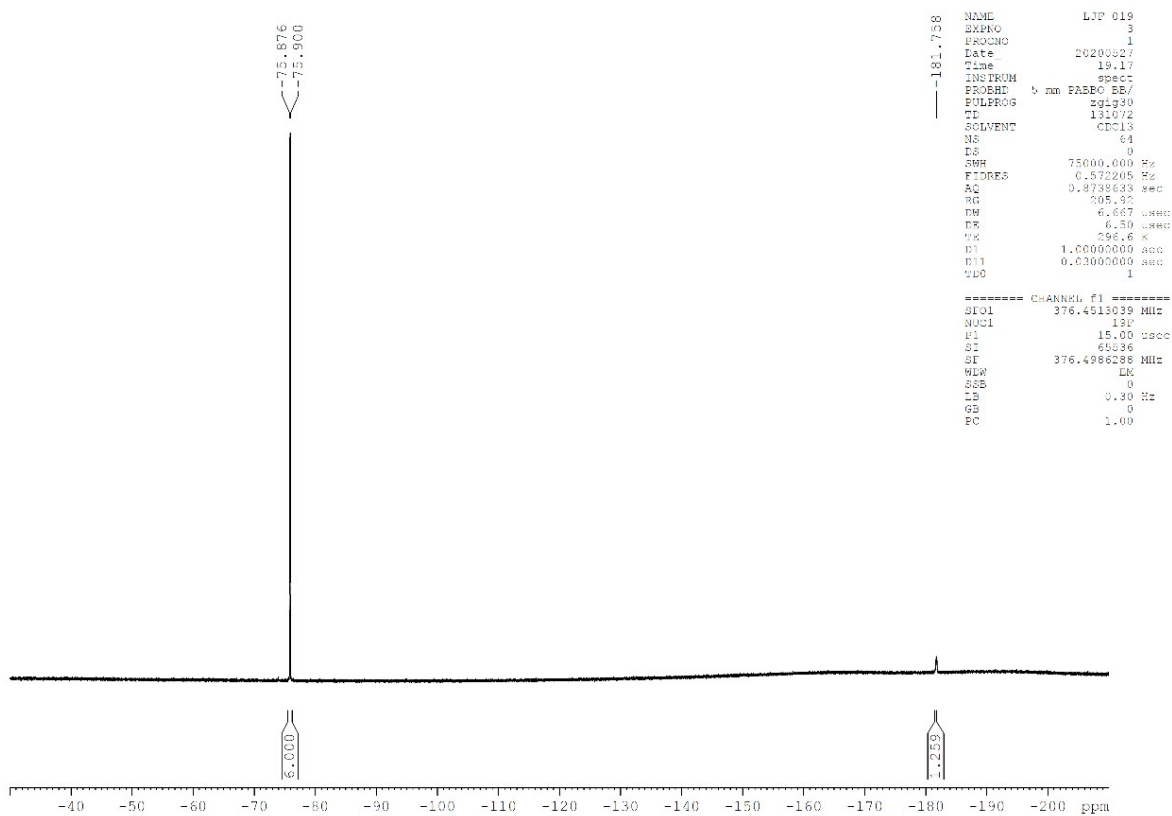



<sup>1</sup>H NMR Spectrum of Rh<sup>III</sup>(btp)<sup>c</sup>C<sub>6</sub>F<sub>11</sub> **2b**

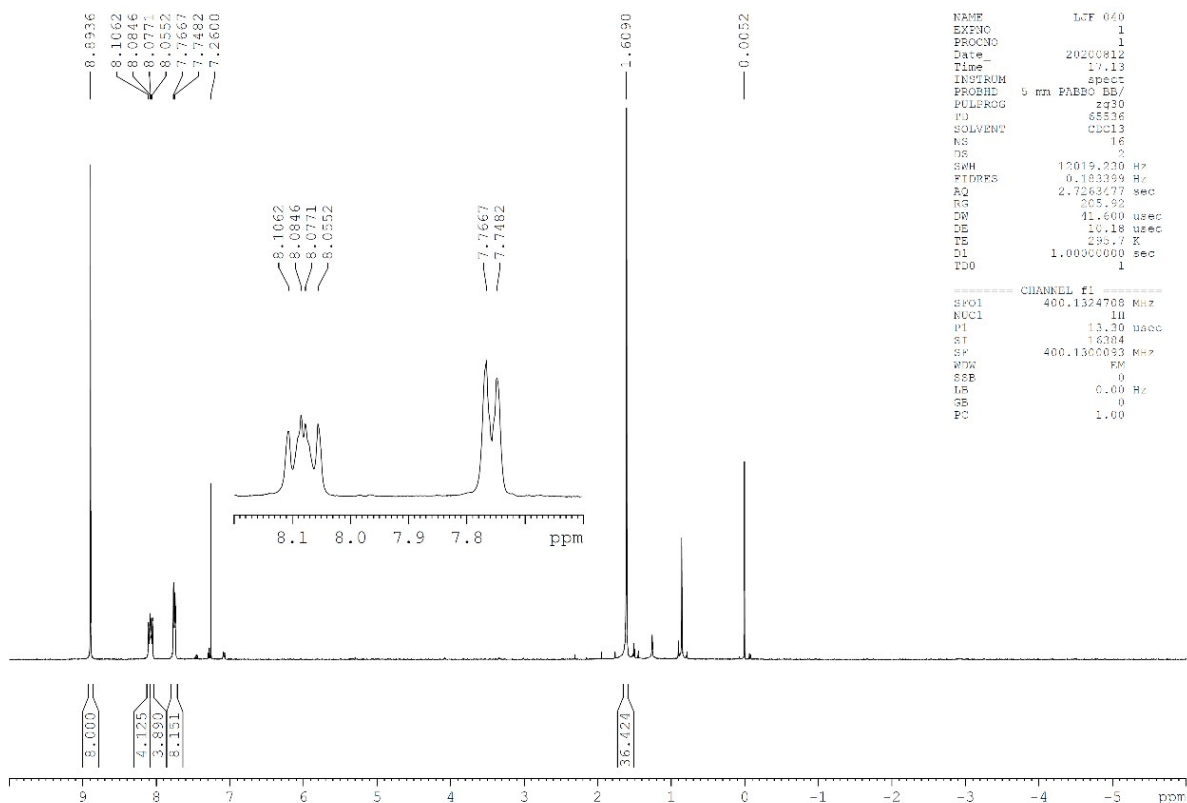

<sup>19</sup>F NMR Spectrum of Rh<sup>III</sup>(btp)<sup>c</sup>C<sub>6</sub>F<sub>11</sub> **2b**

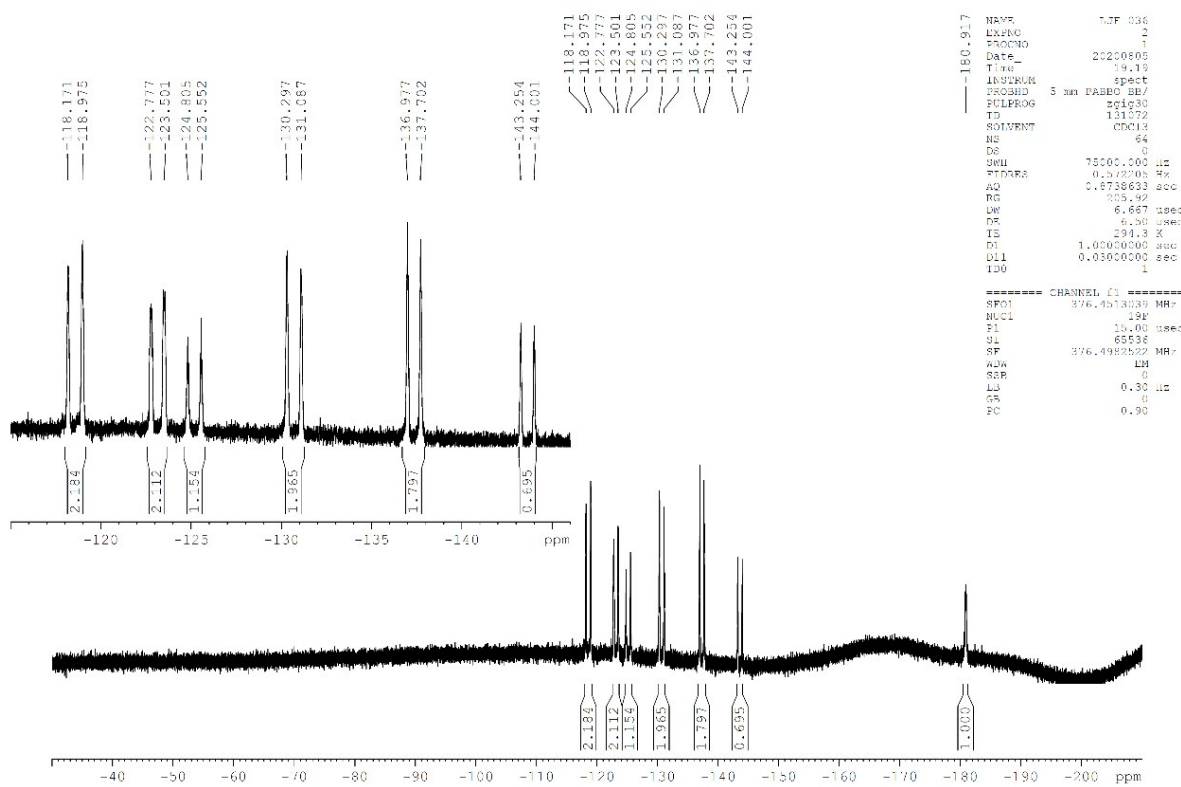

<sup>1</sup>H NMR Spectrum of Rh<sup>III</sup>(btp)<sup>n</sup>C<sub>3</sub>F<sub>7</sub> 2c

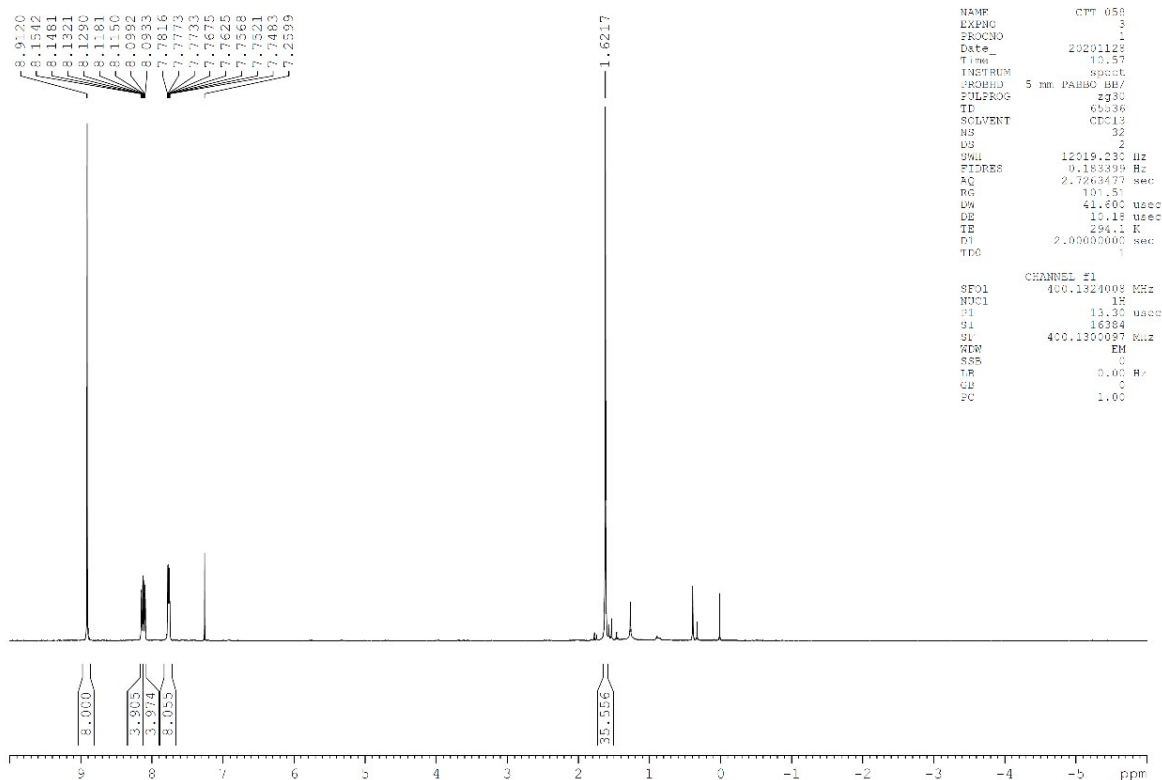

<sup>19</sup>F NMR Spectrum of Rh<sup>III</sup>(btp)<sup>n</sup>C<sub>3</sub>F<sub>7</sub> 2c

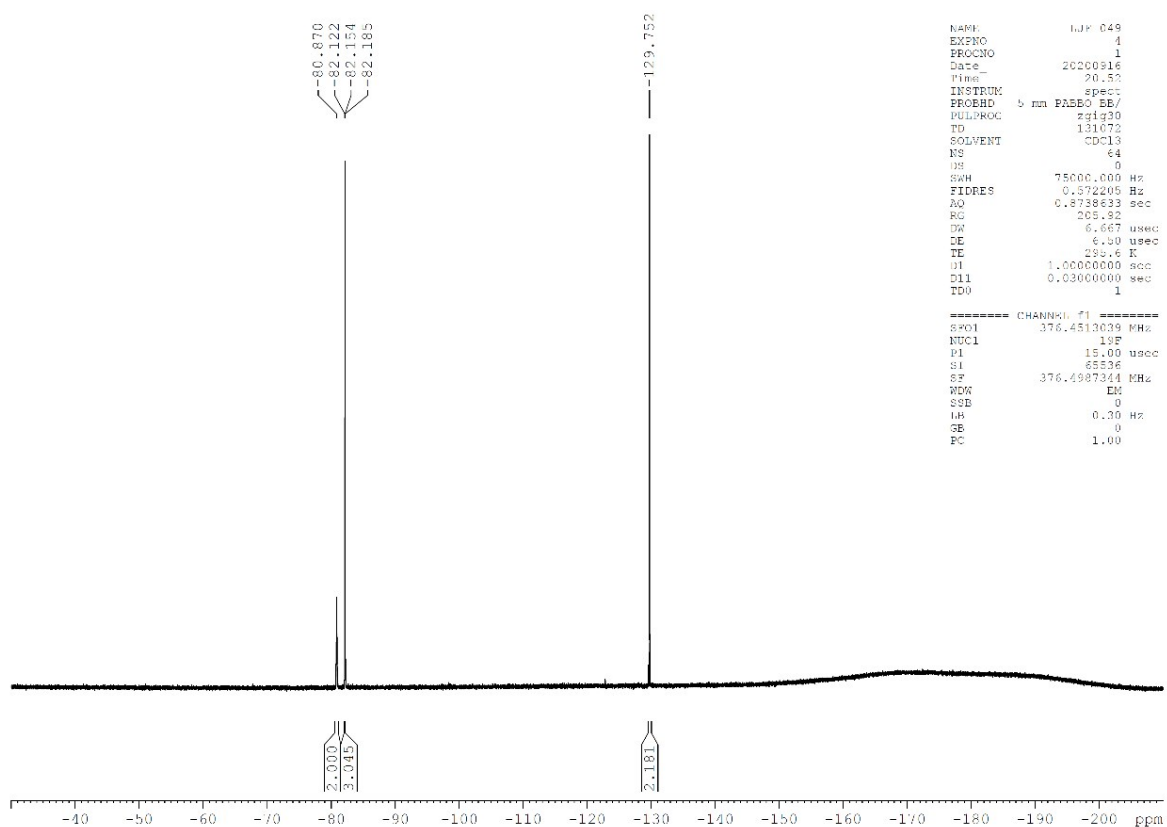

# <sup>1</sup>H NMR Spectrum of Rh<sup>III</sup>(btp)<sup>n</sup>C<sub>4</sub>F<sub>9</sub> 2d

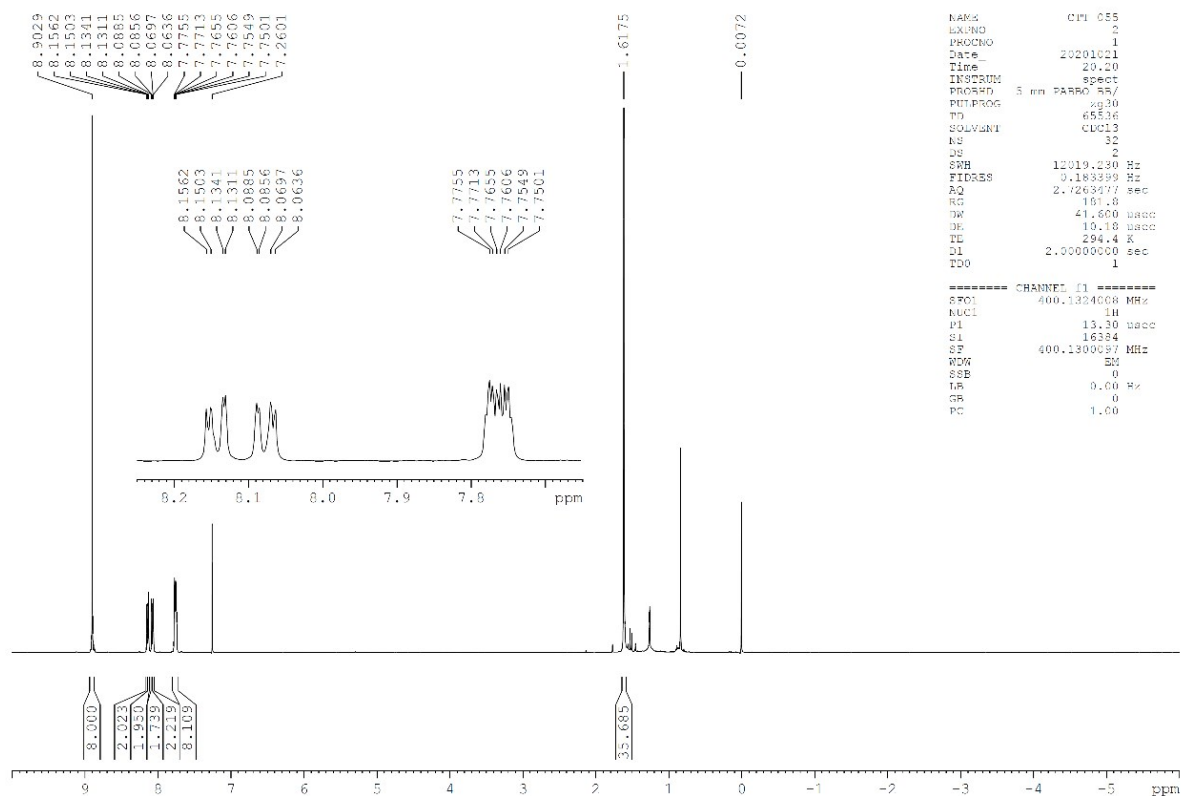

# <sup>19</sup>F NMR Spectrum of Rh<sup>III</sup>(btp)<sup>n</sup>C<sub>4</sub>F<sub>9</sub> 2d

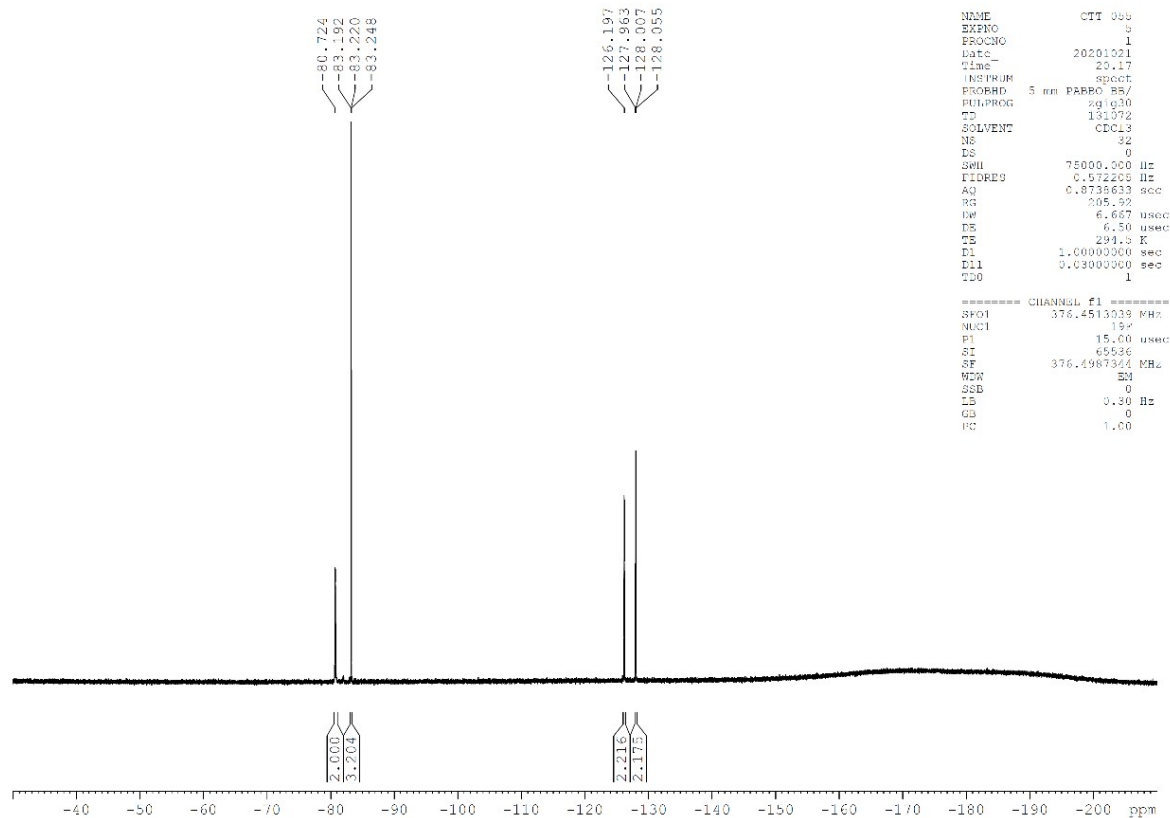

# <sup>1</sup>H NMR Spectrum of Rh<sup>III</sup>(btp)<sup>n</sup>C<sub>6</sub>F<sub>13</sub> 2e

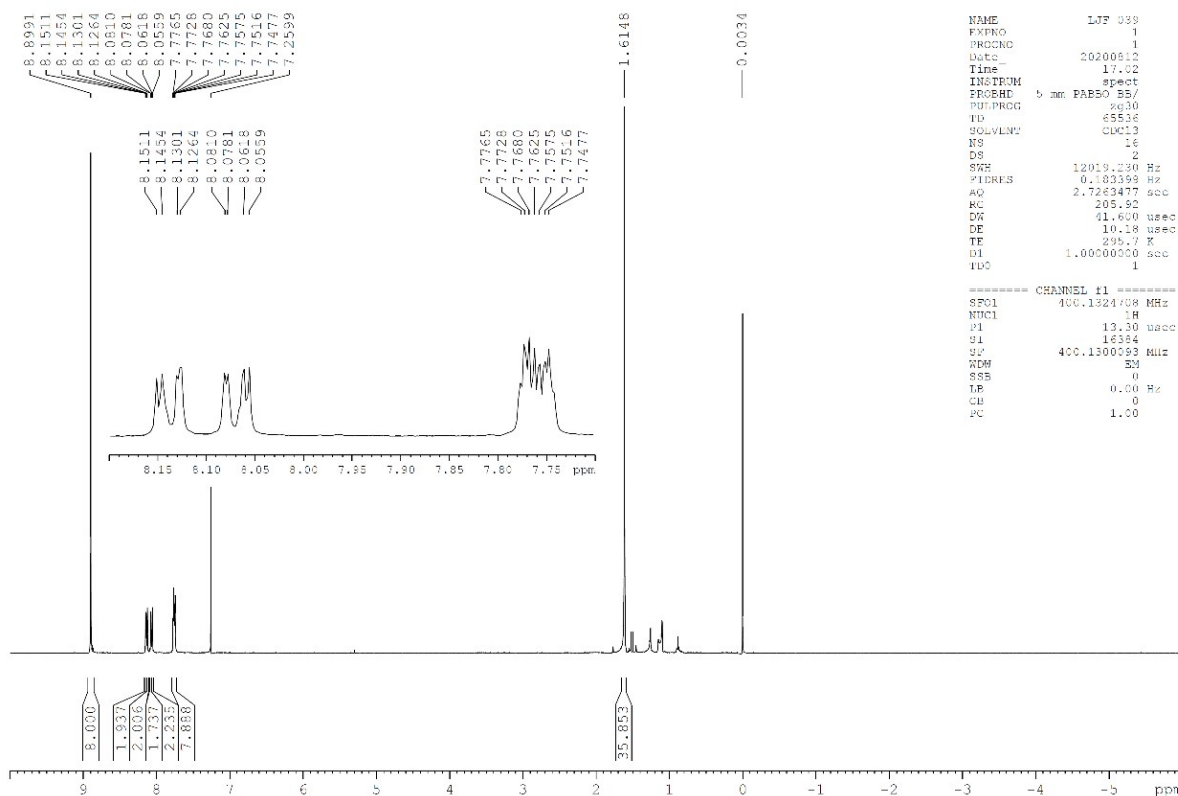

# <sup>19</sup>F NMR Spectrum of Rh<sup>III</sup>(btp)<sup>n</sup>C<sub>6</sub>F<sub>13</sub> 2e

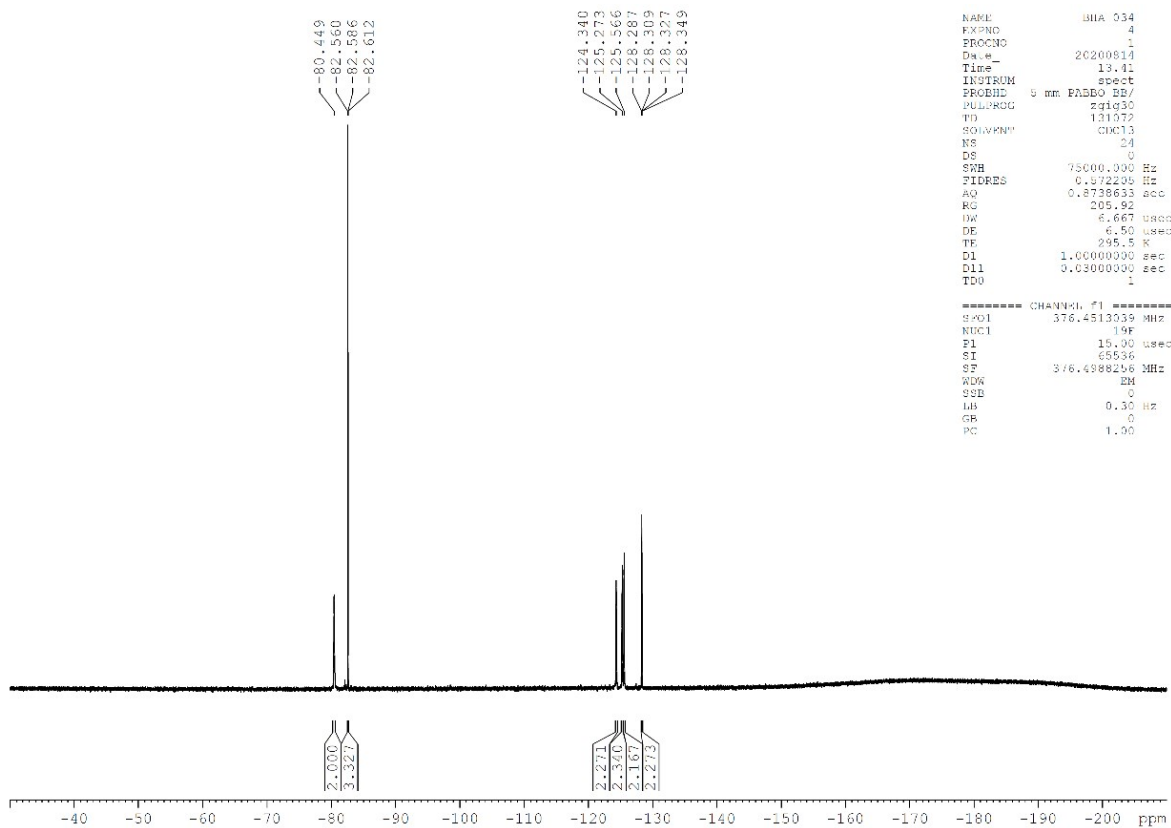

<sup>1</sup>H NMR Spectrum of Rh<sup>III</sup>(btp<sup>+</sup>)<sup>n</sup>C<sub>10</sub>F<sub>21</sub> **2f**

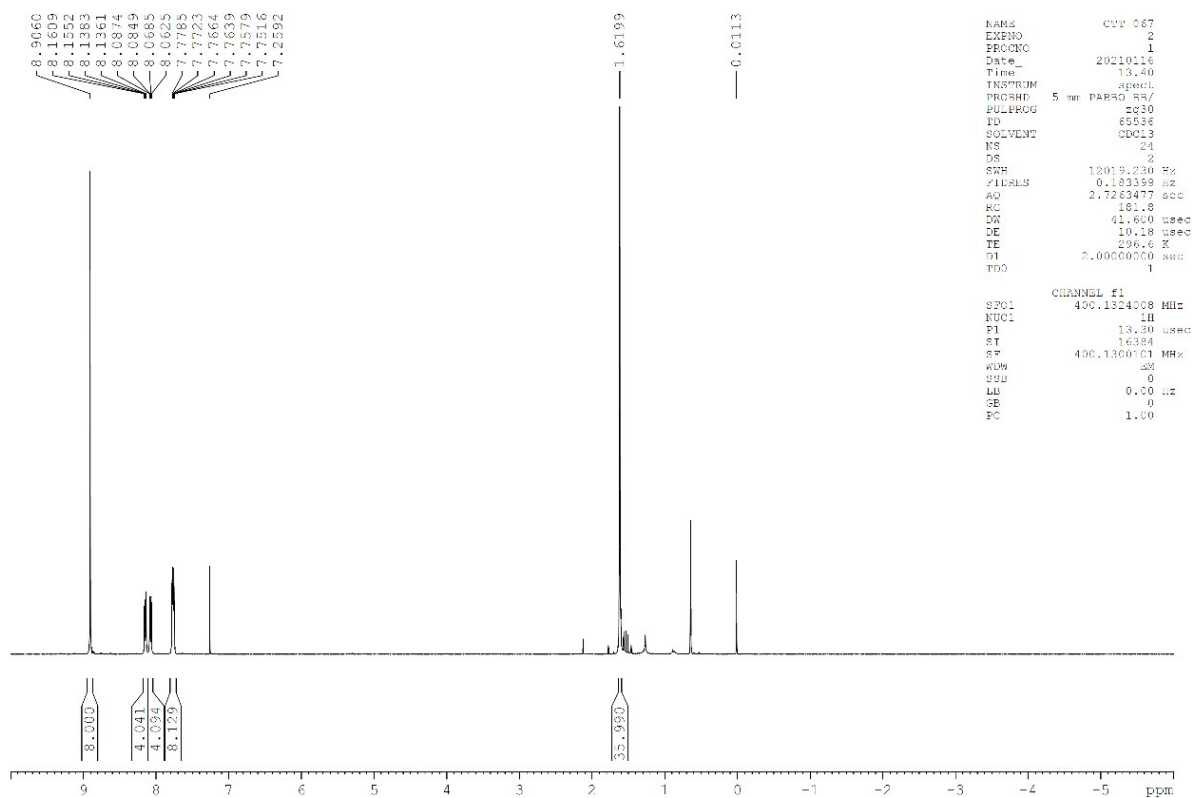

<sup>19</sup>F NMR Spectrum of Rh<sup>III</sup>(btp<sup>+</sup>)<sup>n</sup>C<sub>10</sub>F<sub>21</sub> **2f**

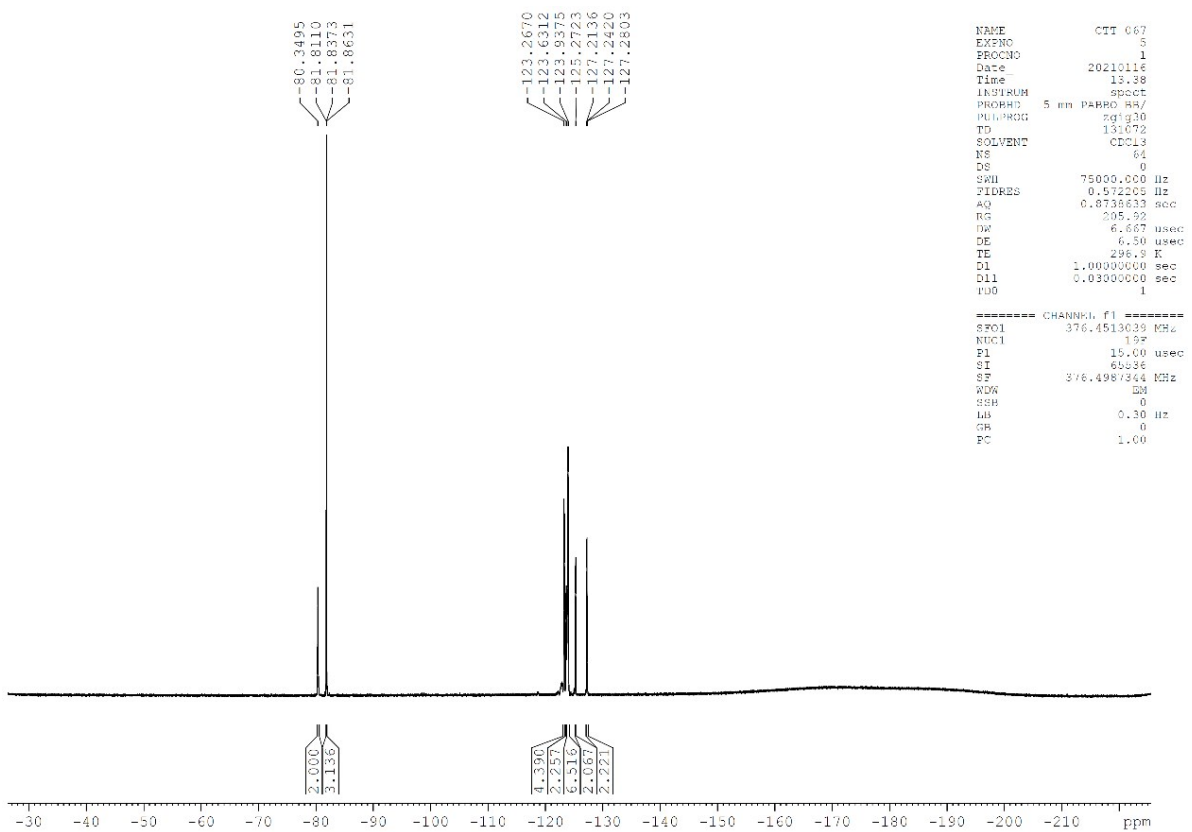

# <sup>1</sup>H NMR Spectrum of Rh<sup>III</sup>(btp<sub>p</sub>)CF<sub>2</sub>C<sub>6</sub>F<sub>5</sub> 2g

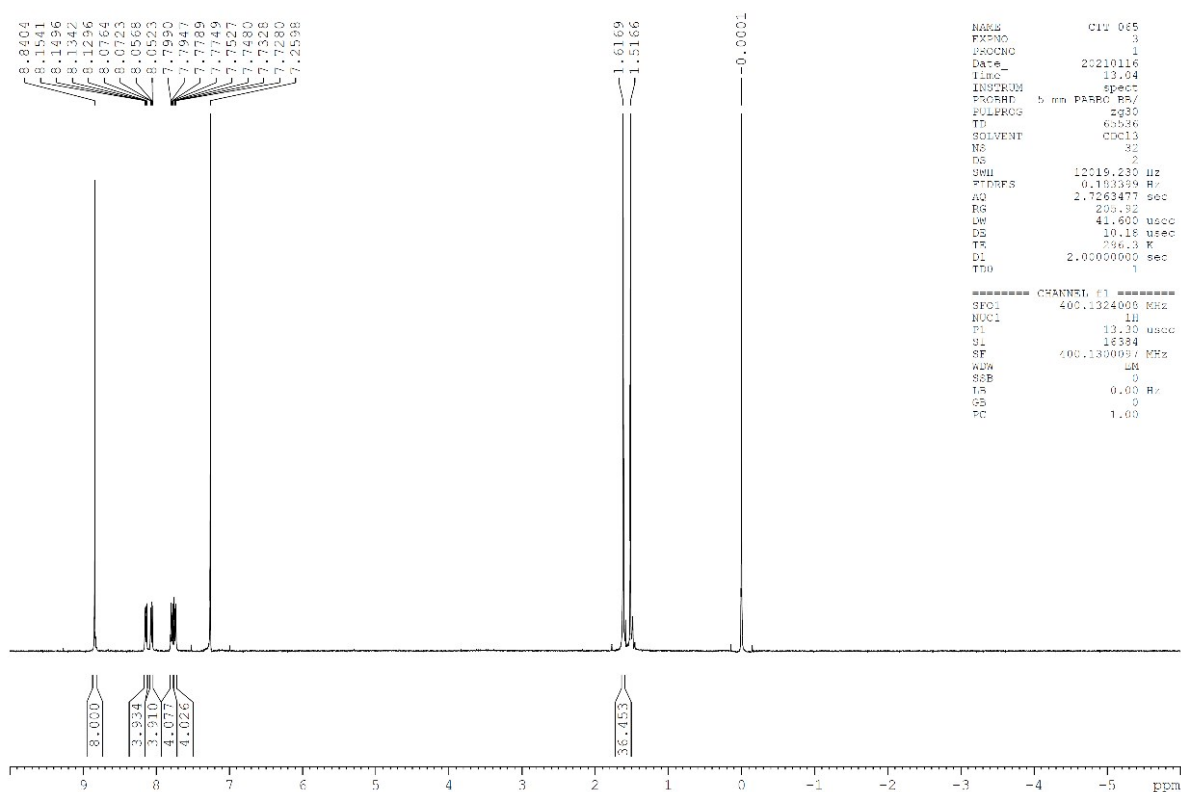

# <sup>19</sup>F NMR Spectrum of Rh<sup>III</sup>(btp<sub>p</sub>)CF<sub>2</sub>C<sub>6</sub>F<sub>5</sub> 2g

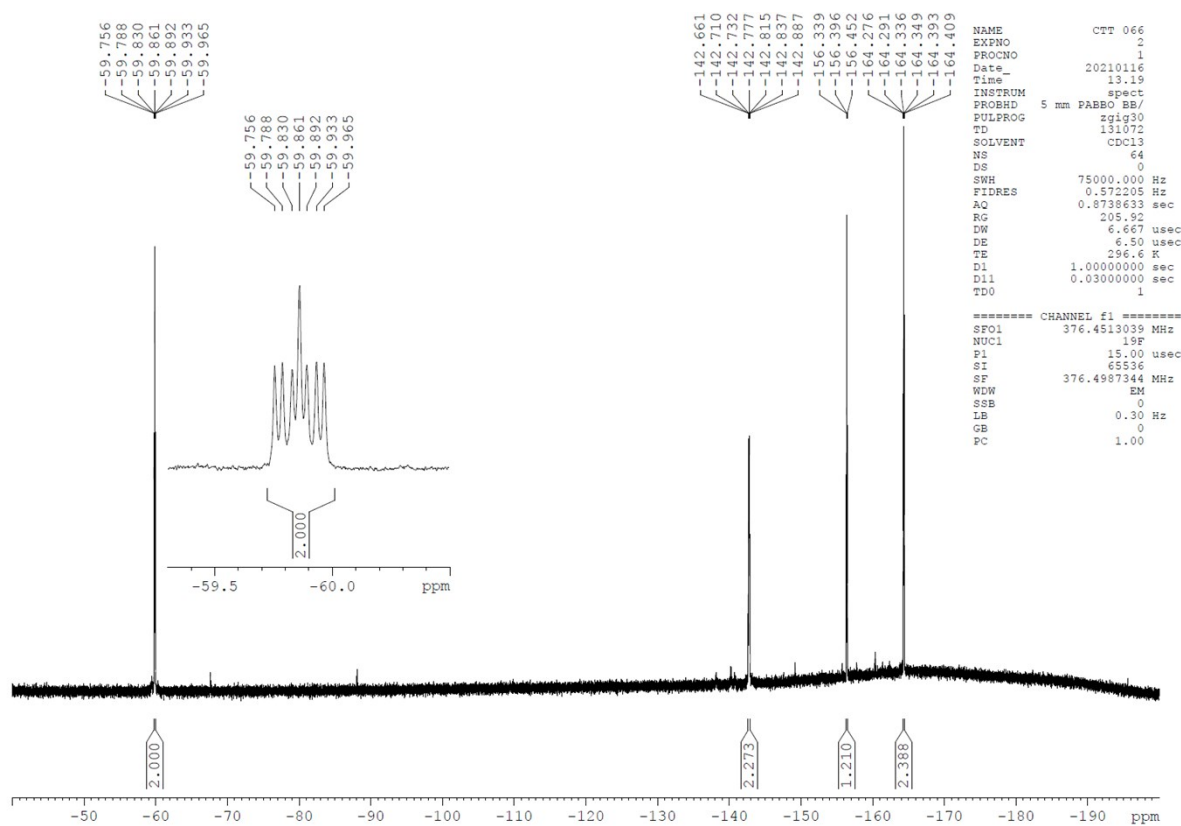

<sup>1</sup>H NMR Spectrum of Rh<sup>III</sup>(ttp)<sup>d</sup>C<sub>3</sub>F<sub>7</sub> **4a**

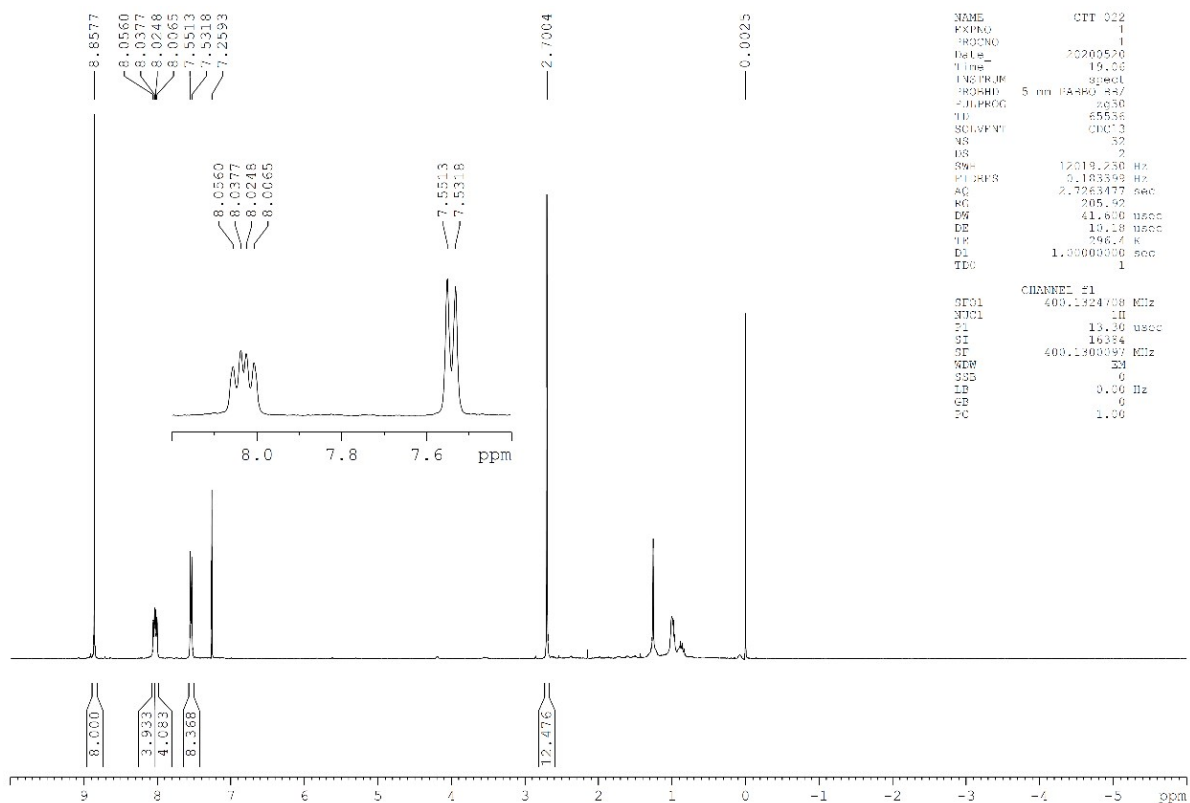

<sup>19</sup>F NMR Spectrum of Rh<sup>III</sup>(ttp)<sup>d</sup>C<sub>3</sub>F<sub>7</sub> **4a**

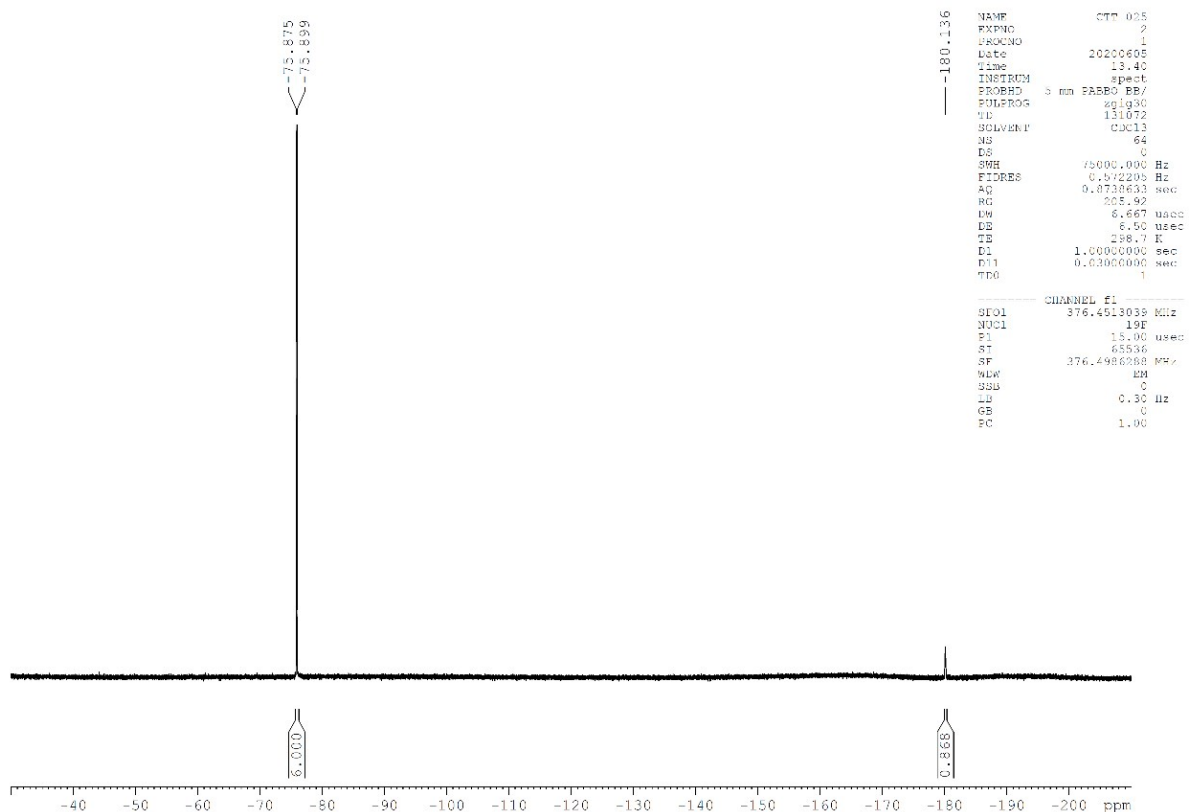

<sup>1</sup>H NMR Spectrum of Rh<sup>III</sup>(t<sub>4</sub>-CF<sub>3</sub>pp)<sup>i</sup>C<sub>3</sub>F<sub>7</sub> **5a**

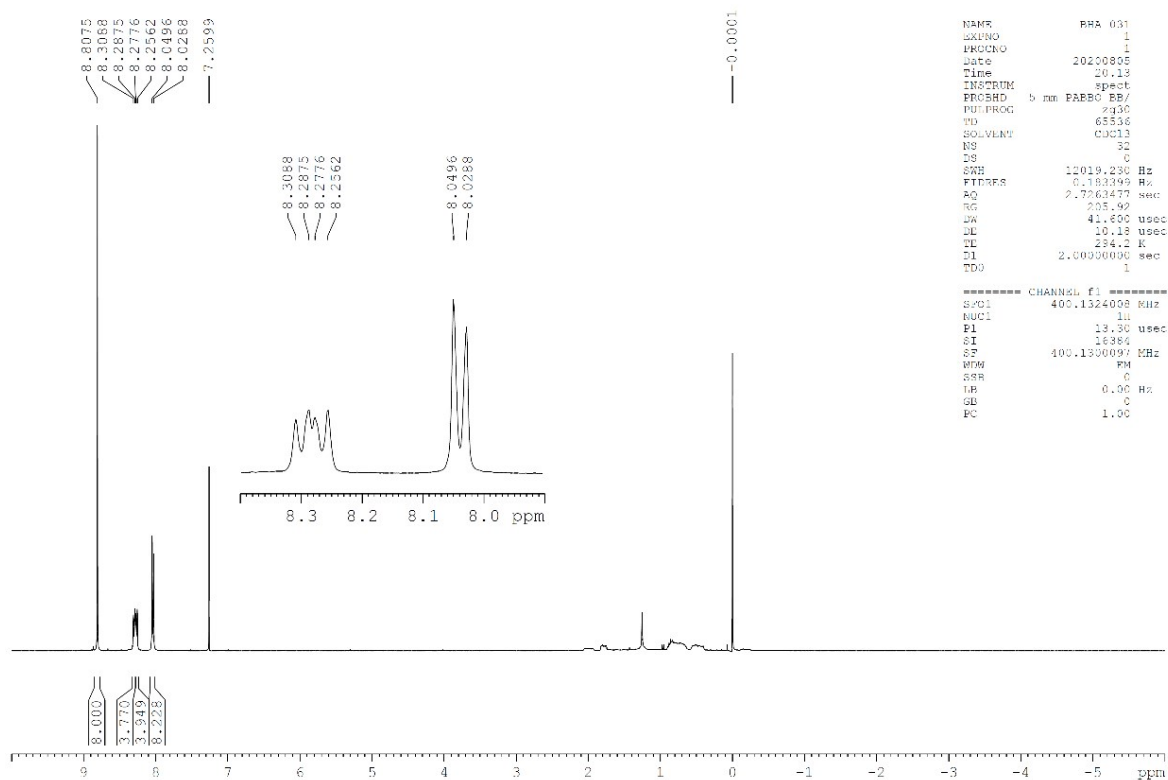

<sup>19</sup>F NMR Spectrum of Rh<sup>III</sup>(t<sub>4</sub>-CF<sub>3</sub>pp)<sup>i</sup>C<sub>3</sub>F<sub>7</sub> **5a**

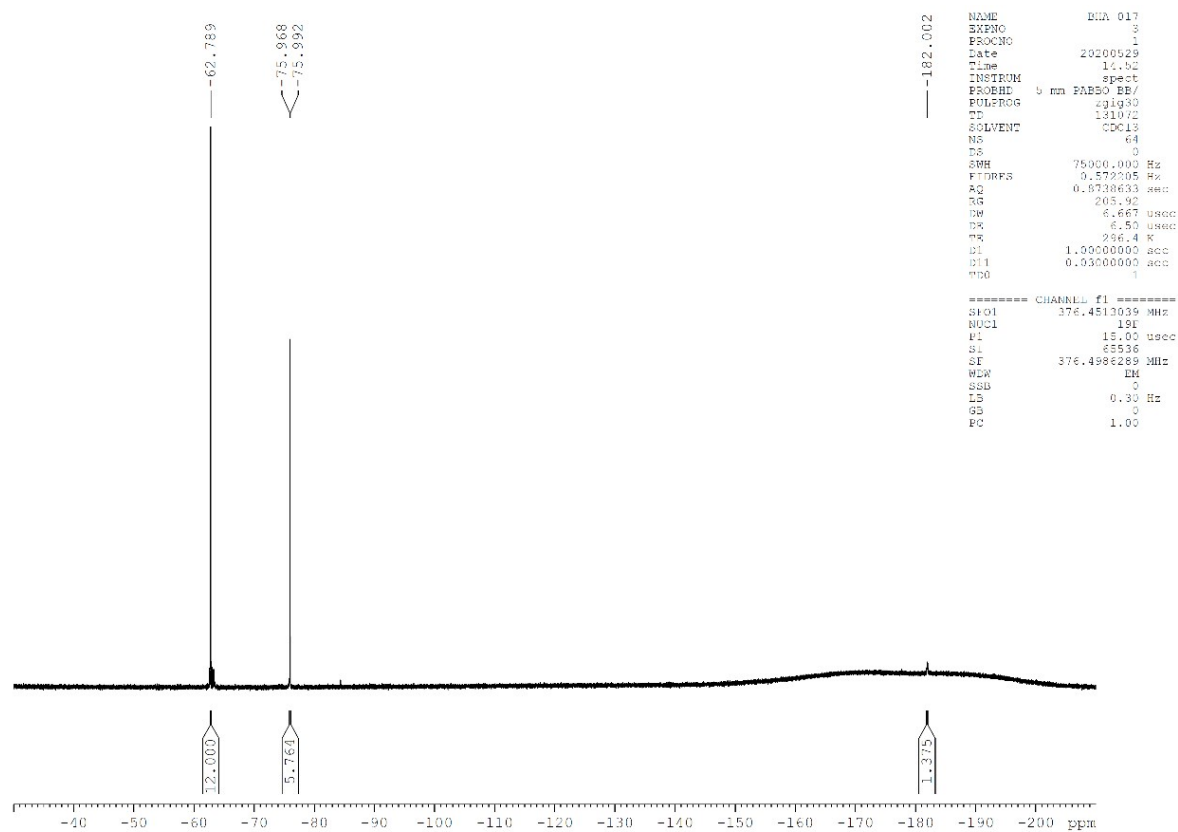



# HRMS Spectra

HRMS Spectrum of Rh<sup>III</sup>(btp)<sub>3</sub>C<sub>3</sub>F<sub>7</sub> **2a**

## Display Report

| Meas. m/z | # | Ion Formula                                                      | m/z       | err [ppm] | mSigma | # Sigma | Score  | rdb  | e <sup>-</sup> Conf | N-Rule | Adduct |
|-----------|---|------------------------------------------------------------------|-----------|-----------|--------|---------|--------|------|---------------------|--------|--------|
| 1109.3864 | 1 | C <sub>63</sub> H <sub>61</sub> F <sub>7</sub> N <sub>4</sub> Rh | 1109.3834 | 2.7       | 22.9   | 1       | 100.00 | 32.5 | even                | ok     | M+H    |

### Acquisition Parameter

|             |          |                      |          |                  |           |
|-------------|----------|----------------------|----------|------------------|-----------|
| Source Type | ESI      | Ion Polarity         | Positive | Set Nebulizer    | 1.0 Bar   |
| Focus       | Active   | Set Capillary        | 4500 V   | Set Dry Heater   | 200 °C    |
| Scan Begin  | 50 m/z   | Set End Plate Offset | -500 V   | Set Dry Gas      | 6.0 l/min |
| Scan End    | 3000 m/z | Set Charging Voltage | 2000 V   | Set Divert Valve | Waste     |
|             |          | Set Corona           | 0 nA     | Set APCI Heater  | 0 °C      |

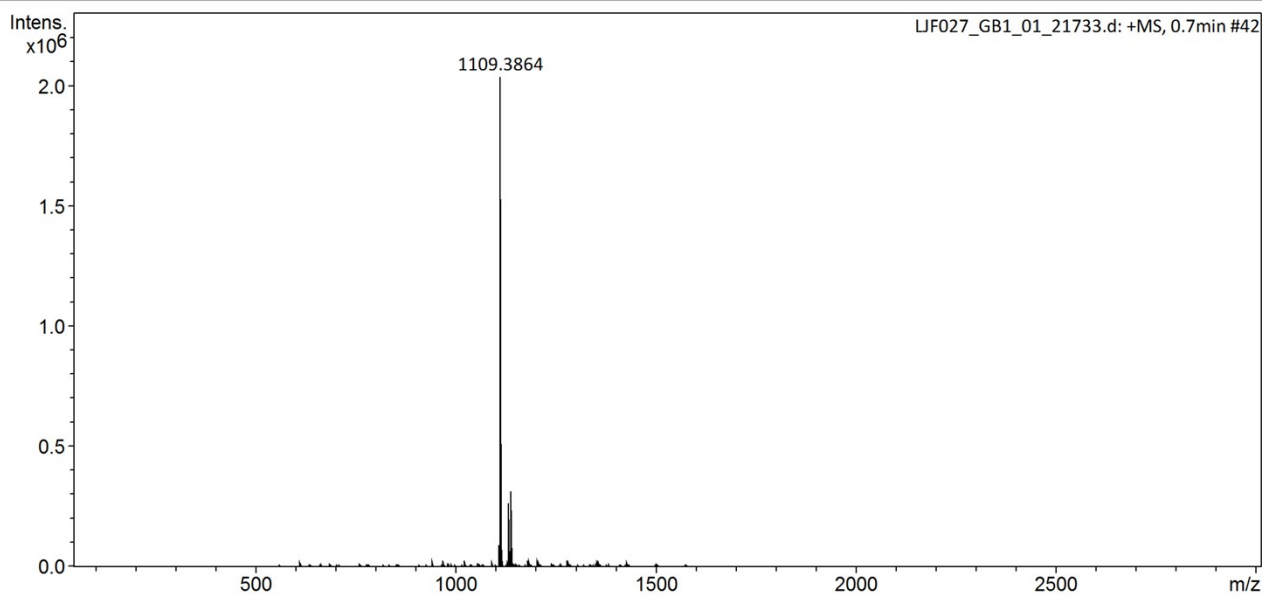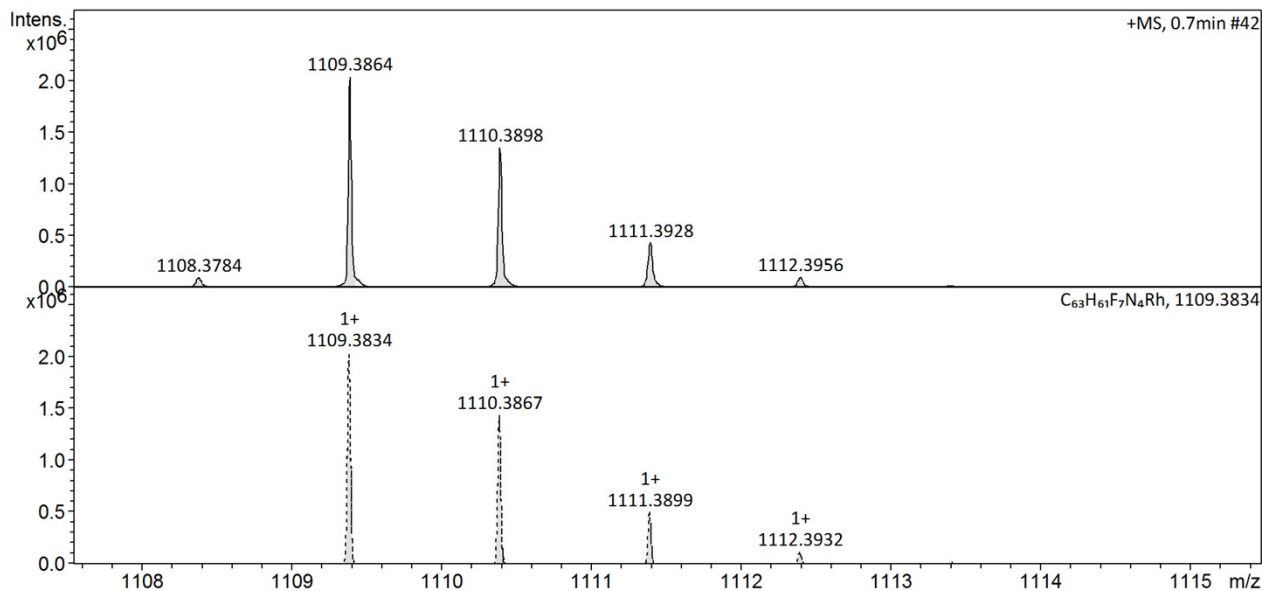

# HRMS Spectrum of Rh<sup>III</sup>(btp<sup>-</sup>)<sub>3</sub>C<sub>6</sub>F<sub>11</sub> **2b**

## Display Report

| Meas. m/z | # | Ion Formula                                                       | m/z       | err [ppm] | mSigma | # Sigma | Score  | rdb  | e <sup>-</sup> Conf | N-Rule | Adduct |
|-----------|---|-------------------------------------------------------------------|-----------|-----------|--------|---------|--------|------|---------------------|--------|--------|
| 1221.3816 | 1 | C <sub>66</sub> H <sub>61</sub> F <sub>11</sub> N <sub>4</sub> Rh | 1221.3770 | 3.7       | 22.0   | 1       | 100.00 | 33.5 | even                | ok     | M+H    |

### Acquisition Parameter

|             |          |                      |          |                  |           |
|-------------|----------|----------------------|----------|------------------|-----------|
| Source Type | ESI      | Ion Polarity         | Positive | Set Nebulizer    | 1.0 Bar   |
| Focus       | Active   | Set Capillary        | 4500 V   | Set Dry Heater   | 200 °C    |
| Scan Begin  | 50 m/z   | Set End Plate Offset | -500 V   | Set Dry Gas      | 6.0 l/min |
| Scan End    | 3000 m/z | Set Charging Voltage | 2000 V   | Set Divert Valve | Waste     |
|             |          | Set Corona           | 0 nA     | Set APCI Heater  | 0 °C      |

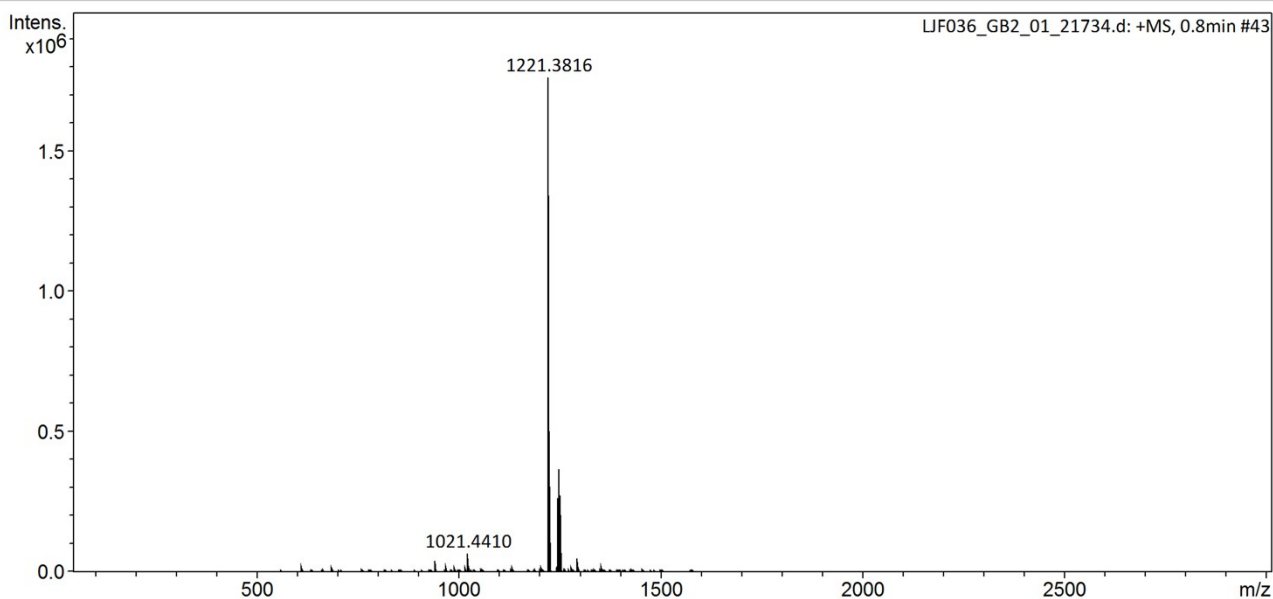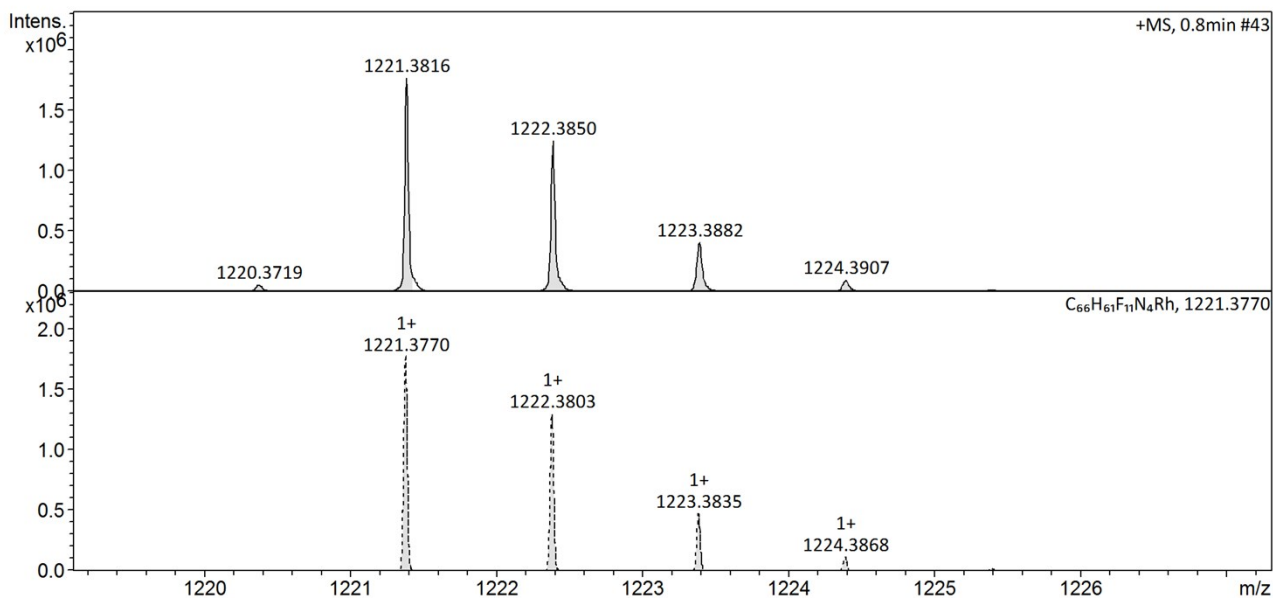

# HRMS Spectrum of Rh<sup>III</sup>(btp)<sub>3</sub>C<sub>3</sub>F<sub>7</sub> 2c

## Display Report

| Meas. m/z | # | Ion Formula                                                      | m/z       | err [ppm] | mSigma | # Sigma | Score  | rdb  | e <sup>-</sup> Conf | N-Rule | Adduct |
|-----------|---|------------------------------------------------------------------|-----------|-----------|--------|---------|--------|------|---------------------|--------|--------|
| 1109.3868 | 1 | C <sub>63</sub> H <sub>61</sub> F <sub>7</sub> N <sub>4</sub> Rh | 1109.3834 | -3.1      | 9.0    | 1       | 100.00 | 32.5 | even                | ok     | M+H    |

### Acquisition Parameter

|             |          |                      |          |                  |           |
|-------------|----------|----------------------|----------|------------------|-----------|
| Source Type | ESI      | Ion Polarity         | Positive | Set Nebulizer    | 1.0 Bar   |
| Focus       | Active   | Set Capillary        | 4500 V   | Set Dry Heater   | 200 °C    |
| Scan Begin  | 50 m/z   | Set End Plate Offset | -500 V   | Set Dry Gas      | 6.0 l/min |
| Scan End    | 3000 m/z | Set Charging Voltage | 2000 V   | Set Divert Valve | Waste     |
|             |          | Set Corona           | 0 nA     | Set APCI Heater  | 0 °C      |

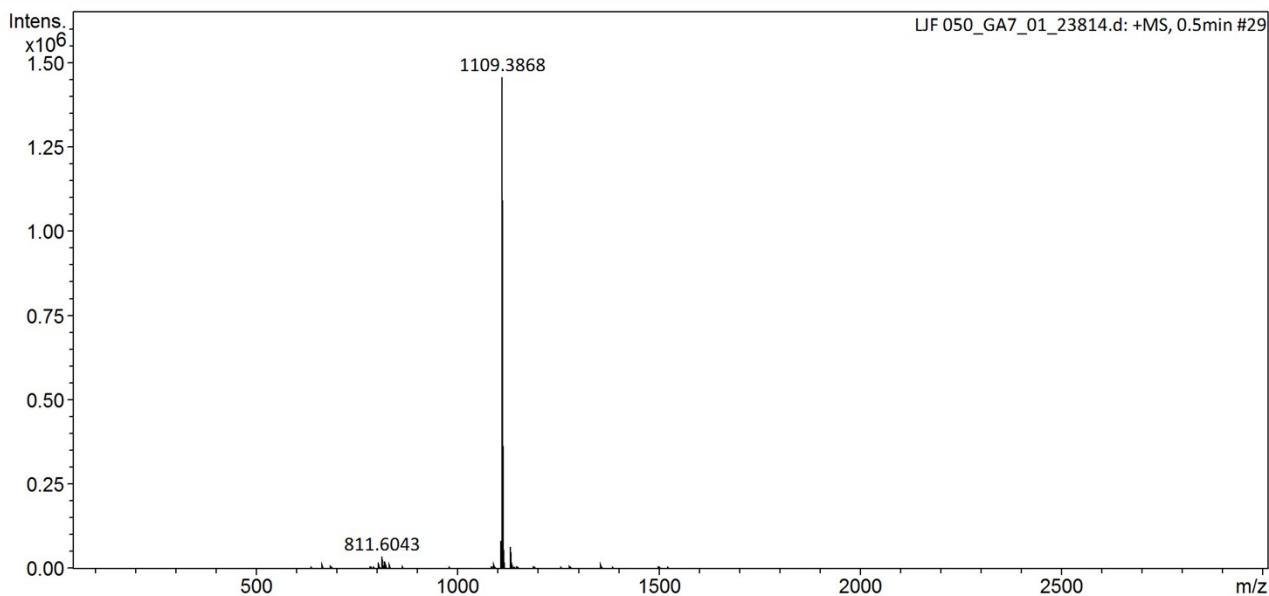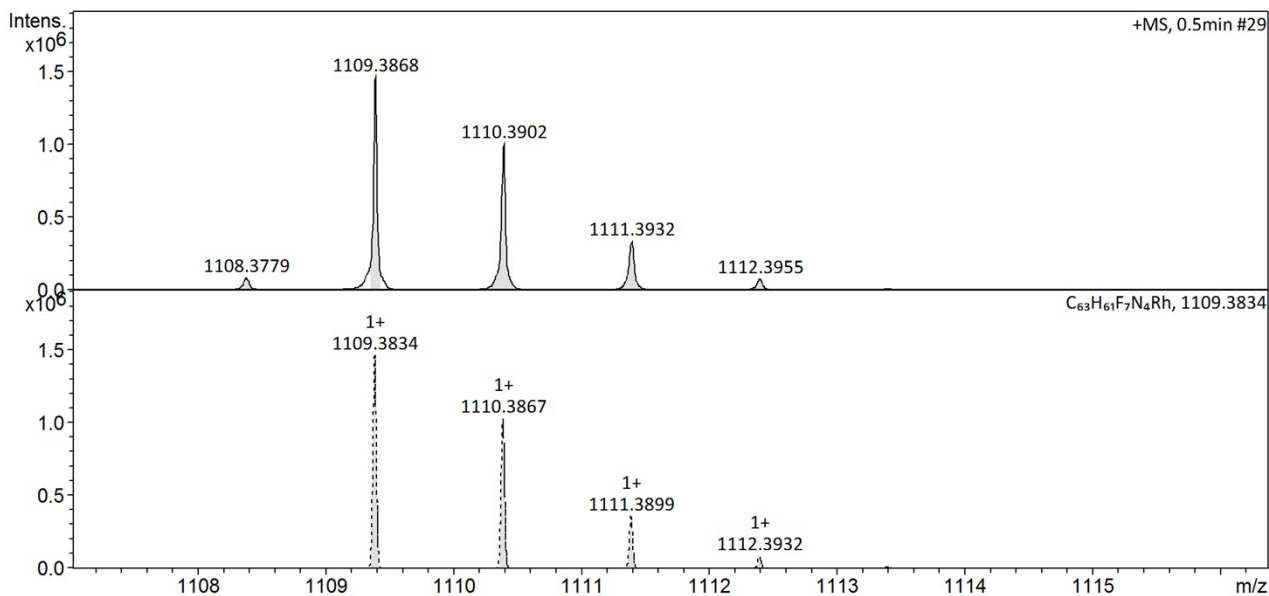

# HRMS Spectrum of Rh<sup>III</sup>(btp<sup>+</sup>)<sub>3</sub>C<sub>4</sub>F<sub>9</sub> 2d

## Display Report

| Meas. m/z | # | Ion Formula                                                      | m/z       | err [ppm] | mSigma | # Sigma | Score  | rdb  | e <sup>-</sup> Conf | N-Rule | Adduct |
|-----------|---|------------------------------------------------------------------|-----------|-----------|--------|---------|--------|------|---------------------|--------|--------|
| 1159.3831 | 1 | C <sub>64</sub> H <sub>61</sub> F <sub>9</sub> N <sub>4</sub> Rh | 1159.3802 | -2.5      | 33.3   | 2       | 100.00 | 32.5 | even                | ok     | M+H    |

### Acquisition Parameter

|             |          |                      |          |                  |           |
|-------------|----------|----------------------|----------|------------------|-----------|
| Source Type | ESI      | Ion Polarity         | Positive | Set Nebulizer    | 1.0 Bar   |
| Focus       | Active   | Set Capillary        | 4500 V   | Set Dry Heater   | 200 °C    |
| Scan Begin  | 50 m/z   | Set End Plate Offset | -500 V   | Set Dry Gas      | 6.0 l/min |
| Scan End    | 3000 m/z | Set Charging Voltage | 2000 V   | Set Divert Valve | Waste     |
|             |          | Set Corona           | 0 nA     | Set APCI Heater  | 0 °C      |

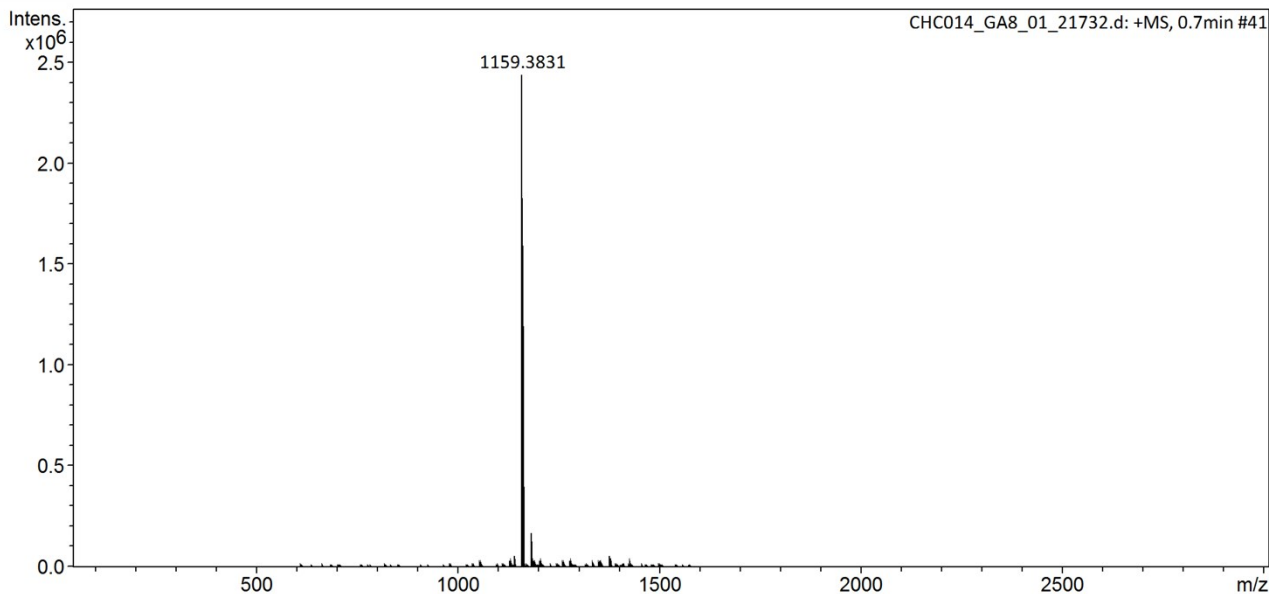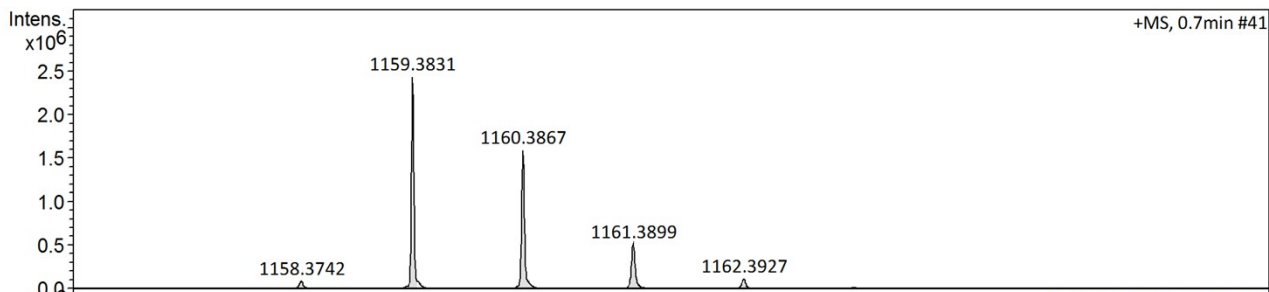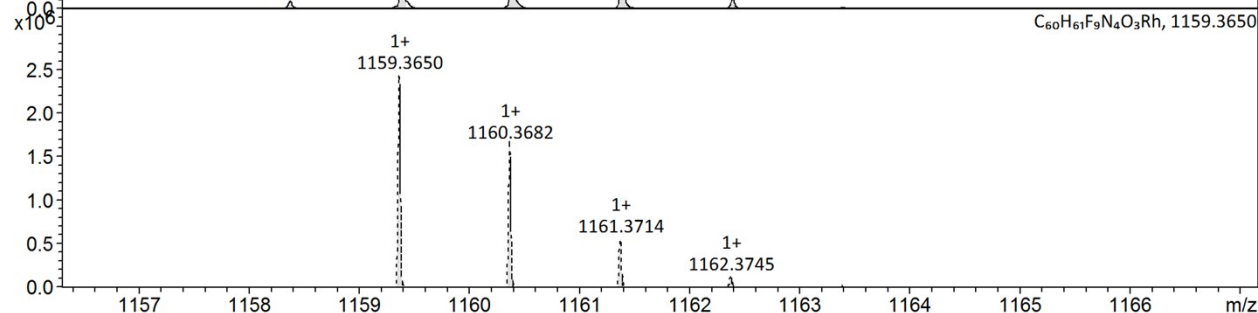

HRMS Spectrum of Rh<sup>III</sup>(btp<sup>+</sup>)<sub>3</sub>C<sub>6</sub>F<sub>13</sub> 2e

Display Report

| Meas. m/z | # | Ion Formula                                                       | m/z       | err [ppm] | mSigma | # Sigma | Score  | rdb  | e <sup>-</sup> Conf | N-Rule | Adduct |
|-----------|---|-------------------------------------------------------------------|-----------|-----------|--------|---------|--------|------|---------------------|--------|--------|
| 1259.3813 | 1 | C <sub>66</sub> H <sub>61</sub> F <sub>13</sub> N <sub>4</sub> Rh | 1259.3738 | 6.0       | 47.2   | 1       | 100.00 | 32.5 | even                | ok     | M+H    |

Acquisition Parameter

|             |          |                      |          |                  |           |
|-------------|----------|----------------------|----------|------------------|-----------|
| Source Type | ESI      | Ion Polarity         | Positive | Set Nebulizer    | 1.0 Bar   |
| Focus       | Active   | Set Capillary        | 4500 V   | Set Dry Heater   | 200 °C    |
| Scan Begin  | 50 m/z   | Set End Plate Offset | -500 V   | Set Dry Gas      | 6.0 l/min |
| Scan End    | 3000 m/z | Set Charging Voltage | 2000 V   | Set Divert Valve | Waste     |
|             |          | Set Corona           | 0 nA     | Set APCI Heater  | 0 °C      |

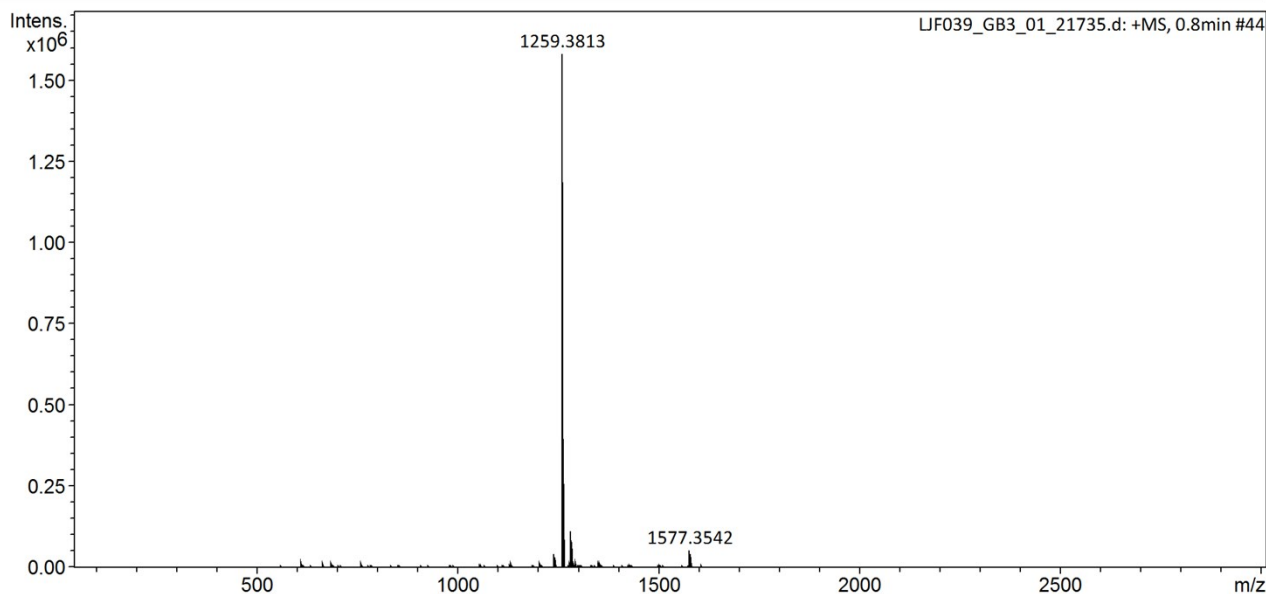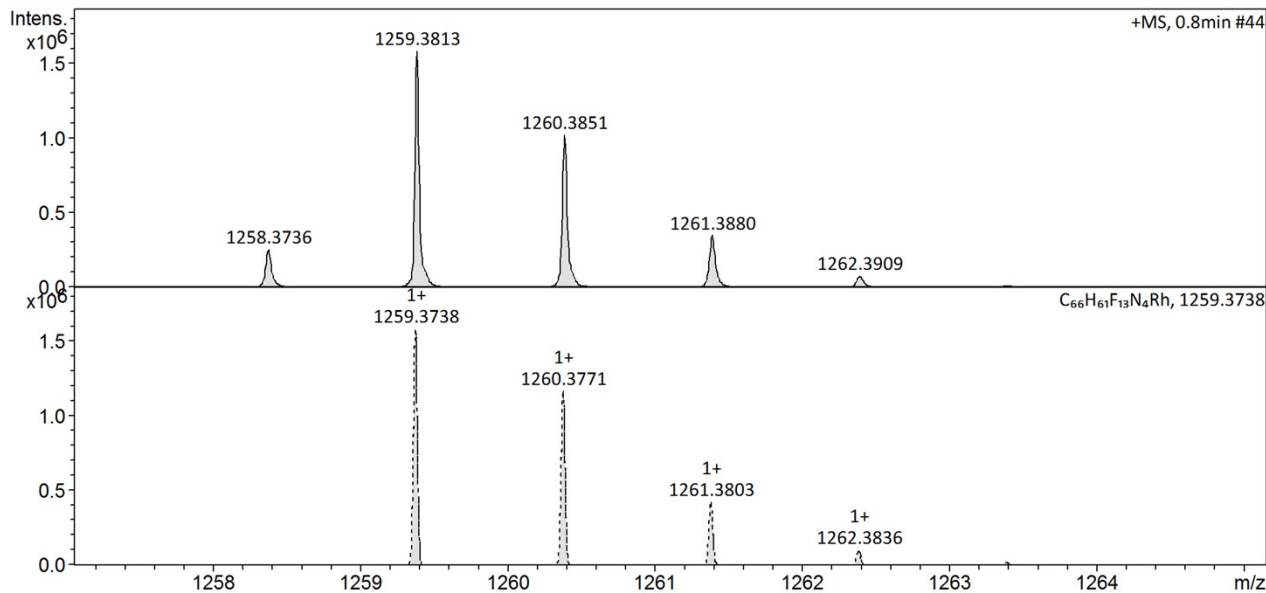

# HRMS Spectrum of Rh<sup>III</sup>(btp<sup>+</sup>)<sub>3</sub>C<sub>10</sub>F<sub>21</sub> 2f

## Display Report

| Meas. m/z | # | Ion Formula                                                       | m/z       | err [ppm] | mSigma | # Sigma | Score  | rdb  | e <sup>-</sup> Conf | N-Rule | Adduct |
|-----------|---|-------------------------------------------------------------------|-----------|-----------|--------|---------|--------|------|---------------------|--------|--------|
| 1459.3664 | 1 | C <sub>70</sub> H <sub>61</sub> F <sub>21</sub> N <sub>4</sub> Rh | 1459.3610 | -3.7      | 12.2   | 1       | 100.00 | 32.5 | even                | ok     | M+H    |

### Acquisition Parameter

|             |          |                      |          |                  |           |
|-------------|----------|----------------------|----------|------------------|-----------|
| Source Type | ESI      | Ion Polarity         | Positive | Set Nebulizer    | 1.0 Bar   |
| Focus       | Active   | Set Capillary        | 4500 V   | Set Dry Heater   | 200 °C    |
| Scan Begin  | 50 m/z   | Set End Plate Offset | -500 V   | Set Dry Gas      | 6.0 l/min |
| Scan End    | 3000 m/z | Set Charging Voltage | 2000 V   | Set Divert Valve | Waste     |
|             |          | Set Corona           | 0 nA     | Set APCI Heater  | 0 °C      |

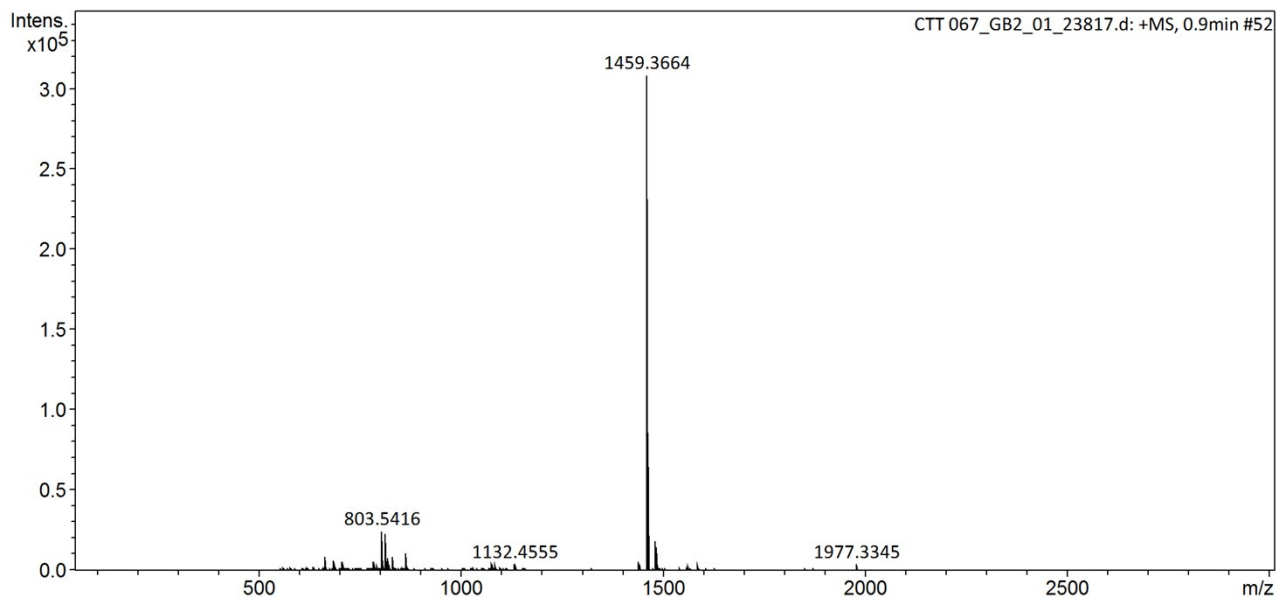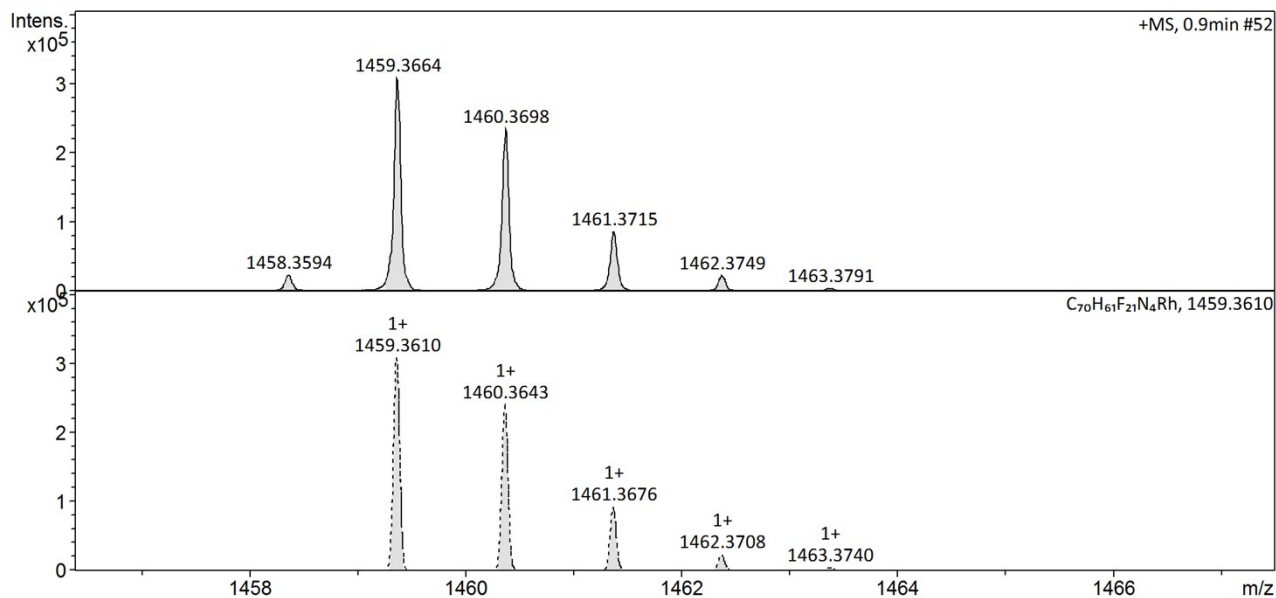

# HRMS Spectrum of Rh<sup>III</sup>(btp<sub>p</sub>)CF<sub>2</sub>C<sub>6</sub>F<sub>5</sub> 2g

## Display Report

| Meas. m/z | # | Ion Formula                                                      | m/z       | err [ppm] | mSigma | # Sigma | Score  | rdb  | e <sup>-</sup> Conf | N-Rule | Adduct |
|-----------|---|------------------------------------------------------------------|-----------|-----------|--------|---------|--------|------|---------------------|--------|--------|
| 1157.3861 | 1 | C <sub>67</sub> H <sub>61</sub> F <sub>7</sub> N <sub>4</sub> Rh | 1157.3834 | 2.4       | 17.7   | 1       | 100.00 | 36.5 | even                | ok     | M+H    |

### Acquisition Parameter

|             |          |                      |          |                  |           |
|-------------|----------|----------------------|----------|------------------|-----------|
| Source Type | ESI      | Ion Polarity         | Positive | Set Nebulizer    | 1.0 Bar   |
| Focus       | Active   | Set Capillary        | 4500 V   | Set Dry Heater   | 200 °C    |
| Scan Begin  | 50 m/z   | Set End Plate Offset | -500 V   | Set Dry Gas      | 6.0 l/min |
| Scan End    | 3000 m/z | Set Charging Voltage | 2000 V   | Set Divert Valve | Waste     |
|             |          | Set Corona           | 0 nA     | Set APCI Heater  | 0 °C      |

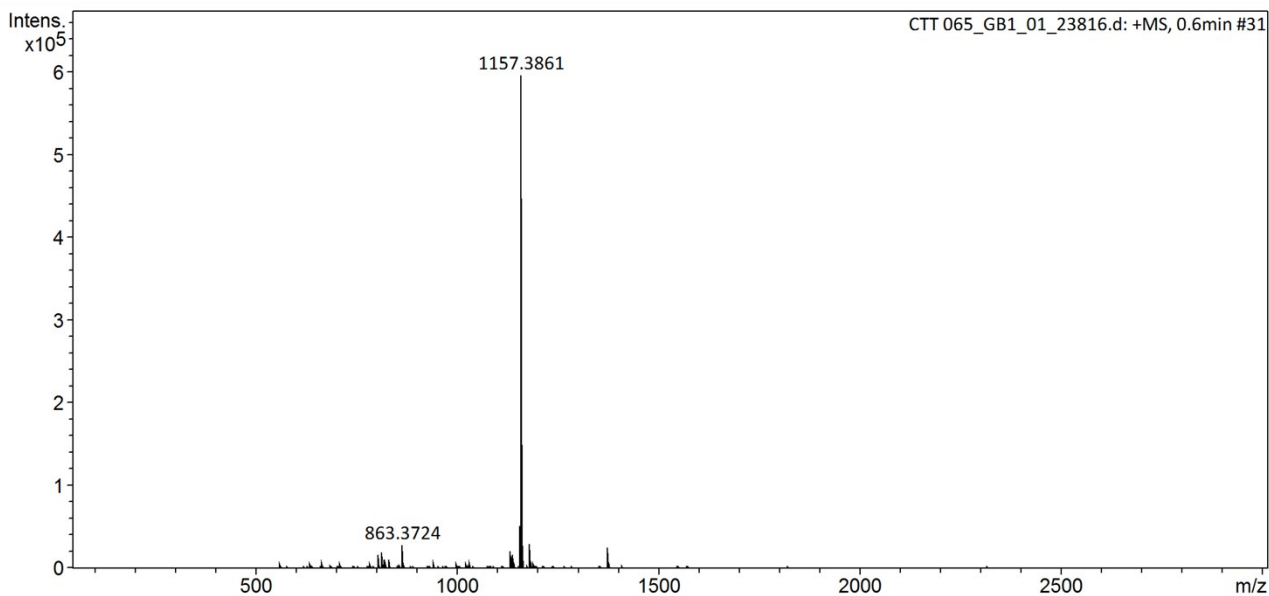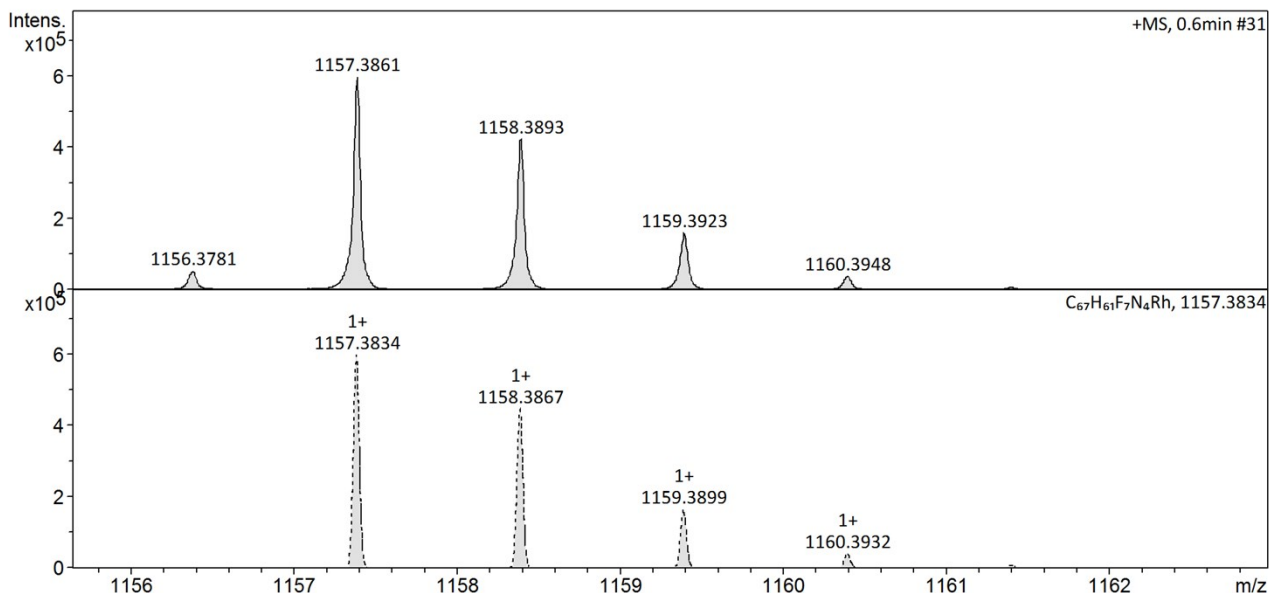

# HRMS Spectrum of Rh<sup>III</sup>(tp)<sup>+</sup>C<sub>3</sub>F<sub>7</sub> 4a

## Display Report

| Meas. m/z | # | Ion Formula                                                      | m/z      | err [ppm] | mSigma | # Sigma | Score  | rdb  | e <sup>-</sup> Conf | N-Rule | Adduct |
|-----------|---|------------------------------------------------------------------|----------|-----------|--------|---------|--------|------|---------------------|--------|--------|
| 940.1902  | 1 | C <sub>51</sub> H <sub>36</sub> F <sub>7</sub> N <sub>4</sub> Rh | 940.1878 | 2.6       | 196.6  | 1       | 100.00 | 33.0 | odd                 | ok     | M      |
| 941.1943  | 1 | C <sub>51</sub> H <sub>37</sub> F <sub>7</sub> N <sub>4</sub> Rh | 941.1956 | 1.4       | 109.1  | 1       | 100.00 | 32.5 | even                | ok     | M+H    |

### Acquisition Parameter

|             |          |                      |          |                  |           |
|-------------|----------|----------------------|----------|------------------|-----------|
| Source Type | ESI      | Ion Polarity         | Positive | Set Nebulizer    | 1.0 Bar   |
| Focus       | Active   | Set Capillary        | 4500 V   | Set Dry Heater   | 200 °C    |
| Scan Begin  | 50 m/z   | Set End Plate Offset | -500 V   | Set Dry Gas      | 6.0 l/min |
| Scan End    | 3000 m/z | Set Charging Voltage | 2000 V   | Set Divert Valve | Waste     |
|             |          | Set Corona           | 0 nA     | Set APCI Heater  | 0 °C      |

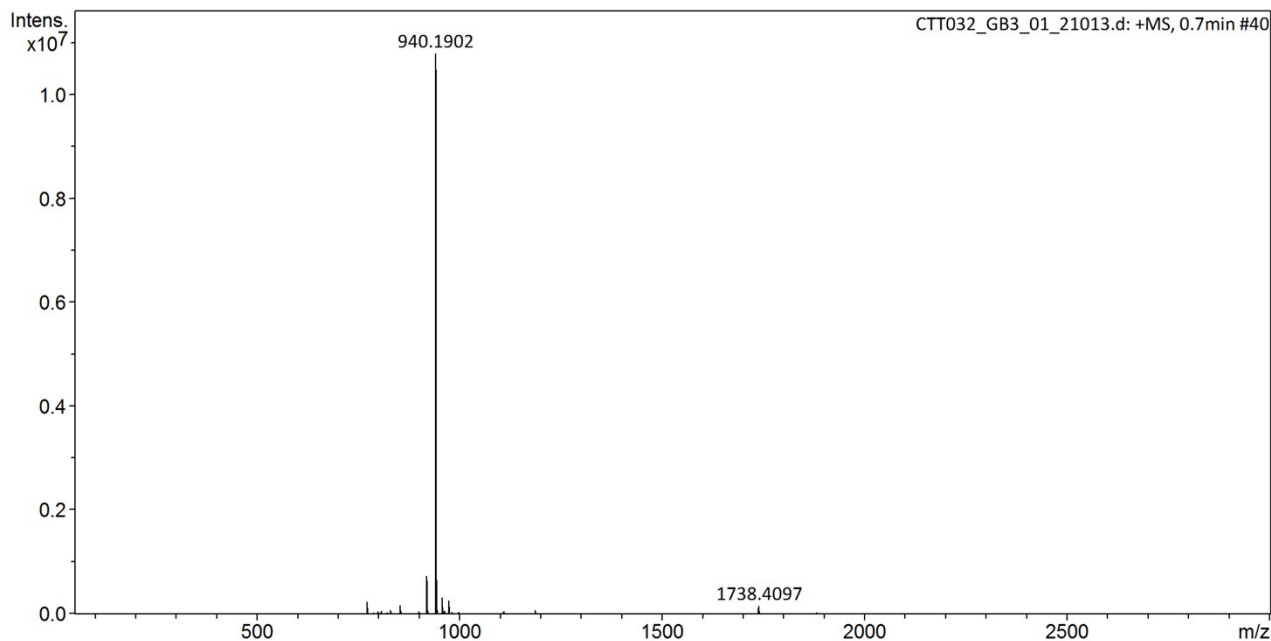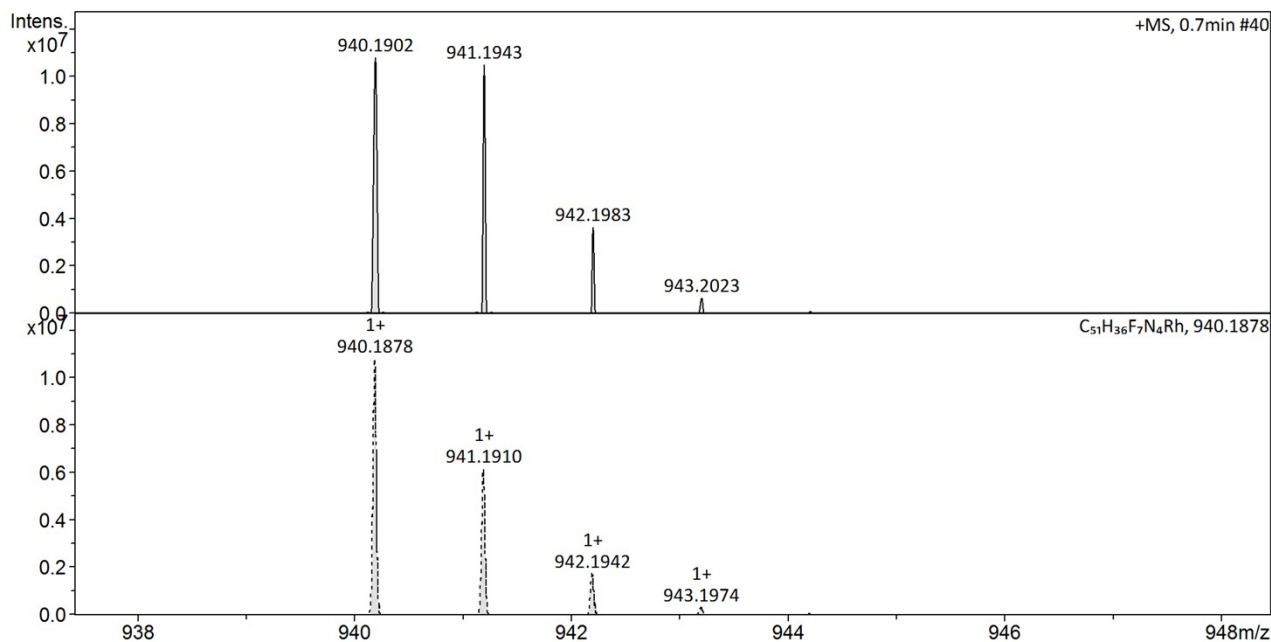



# HRMS Spectrum of Rh<sup>III</sup>(t<sub>4</sub>-CF<sub>3</sub>pp)<sup>i</sup>C<sub>3</sub>F<sub>7</sub> 5a

## Display Report

| Meas. m/z | # | Ion Formula                                                       | m/z       | err [ppm] | mSigma | # Sigma | Score  | rdb  | e <sup>-</sup> Conf | N-Rule | Adduct |
|-----------|---|-------------------------------------------------------------------|-----------|-----------|--------|---------|--------|------|---------------------|--------|--------|
| 1157.0890 | 1 | C <sub>51</sub> H <sub>25</sub> F <sub>19</sub> N <sub>4</sub> Rh | 1157.0825 | -5.6      | 14.5   | 1       | 100.00 | 32.5 | even                | ok     | M+H    |

### Acquisition Parameter

|             |          |                      |          |                  |           |
|-------------|----------|----------------------|----------|------------------|-----------|
| Source Type | ESI      | Ion Polarity         | Positive | Set Nebulizer    | 1.0 Bar   |
| Focus       | Active   | Set Capillary        | 4500 V   | Set Dry Heater   | 200 °C    |
| Scan Begin  | 50 m/z   | Set End Plate Offset | -500 V   | Set Dry Gas      | 6.0 l/min |
| Scan End    | 3000 m/z | Set Charging Voltage | 2000 V   | Set Divert Valve | Waste     |
|             |          | Set Corona           | 0 nA     | Set APCI Heater  | 0 °C      |

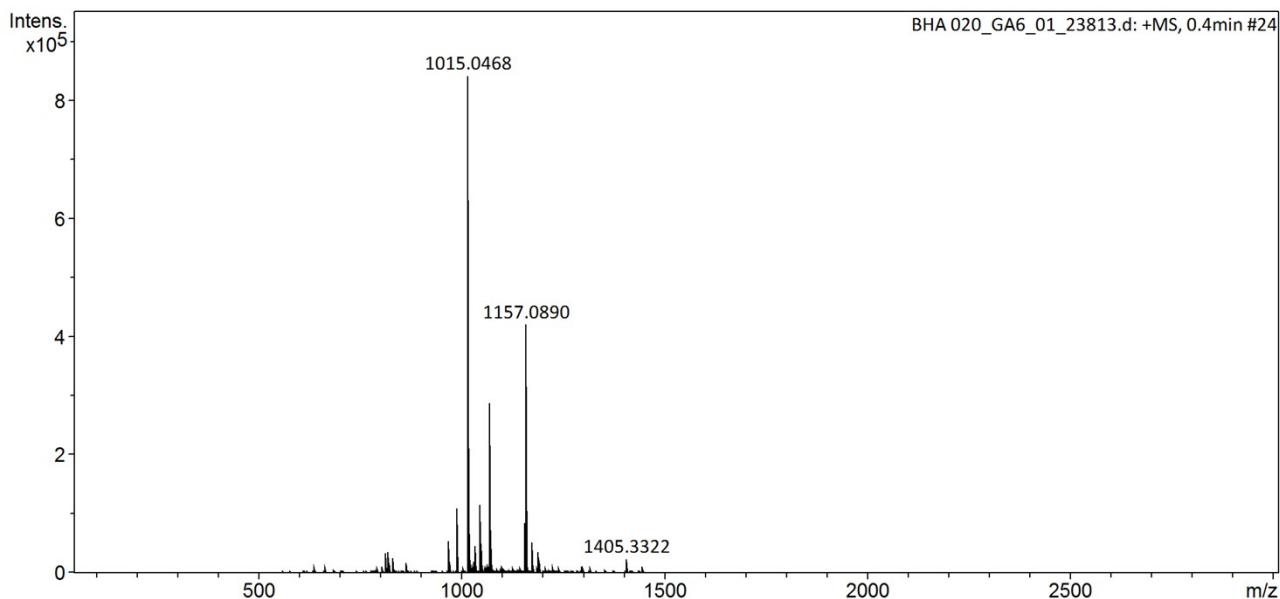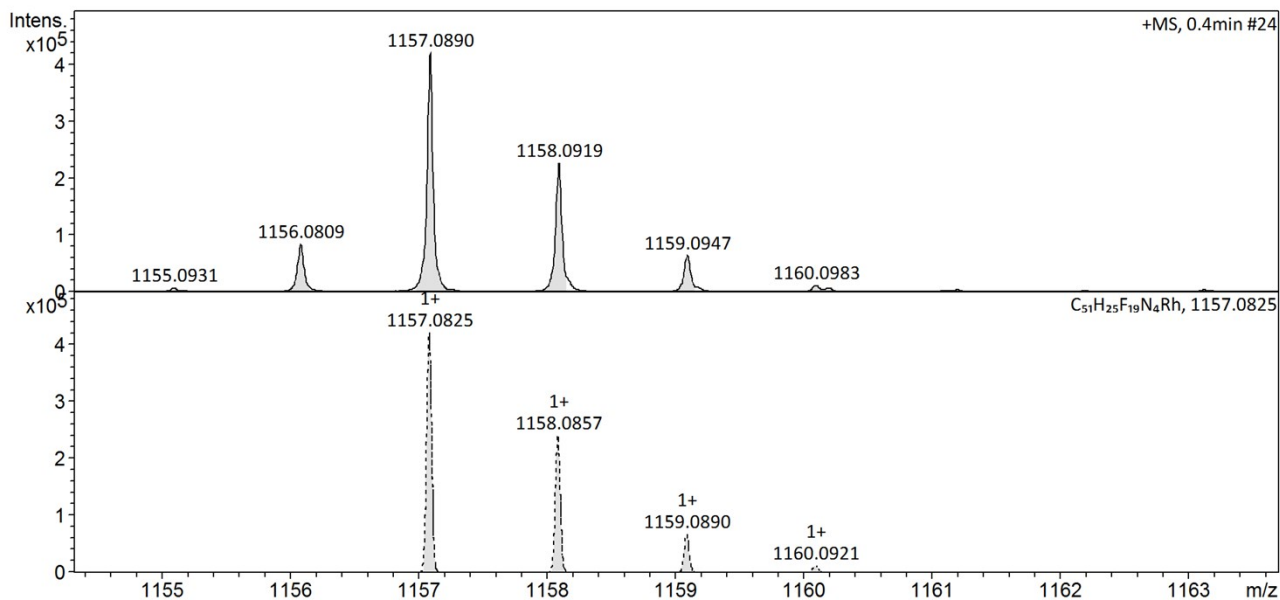

# GCMS Spectra

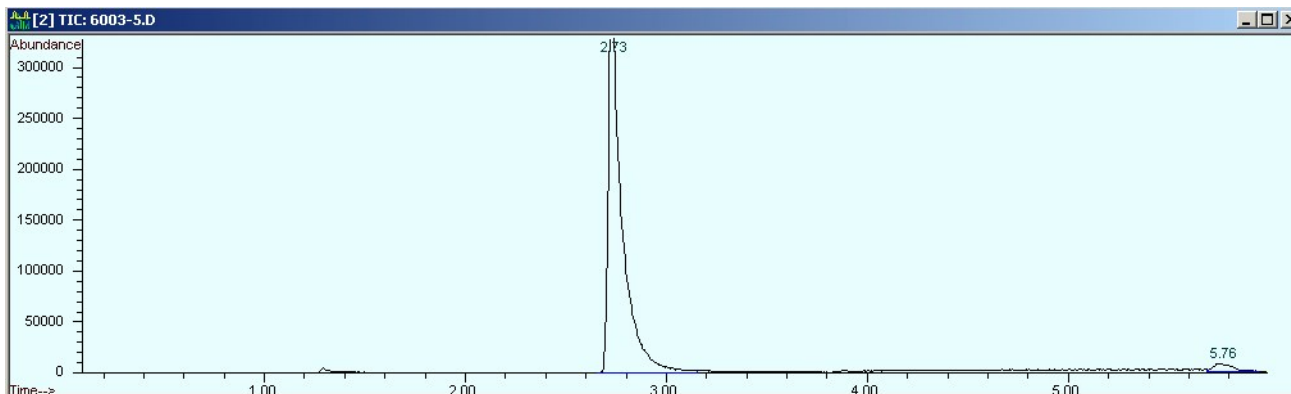

| Peak # | Ret Time | Type | Width | Area    | Start Time | End Time |
|--------|----------|------|-------|---------|------------|----------|
| 1      | 2.727    | rVB  | 0.497 | 1742819 | 2.654      | 3.152    |
| 2      | 5.764    | rVB  | 0.259 | 49774   | 5.691      | 5.950    |

Mass spectrum at  $t_R = 5.764$  min

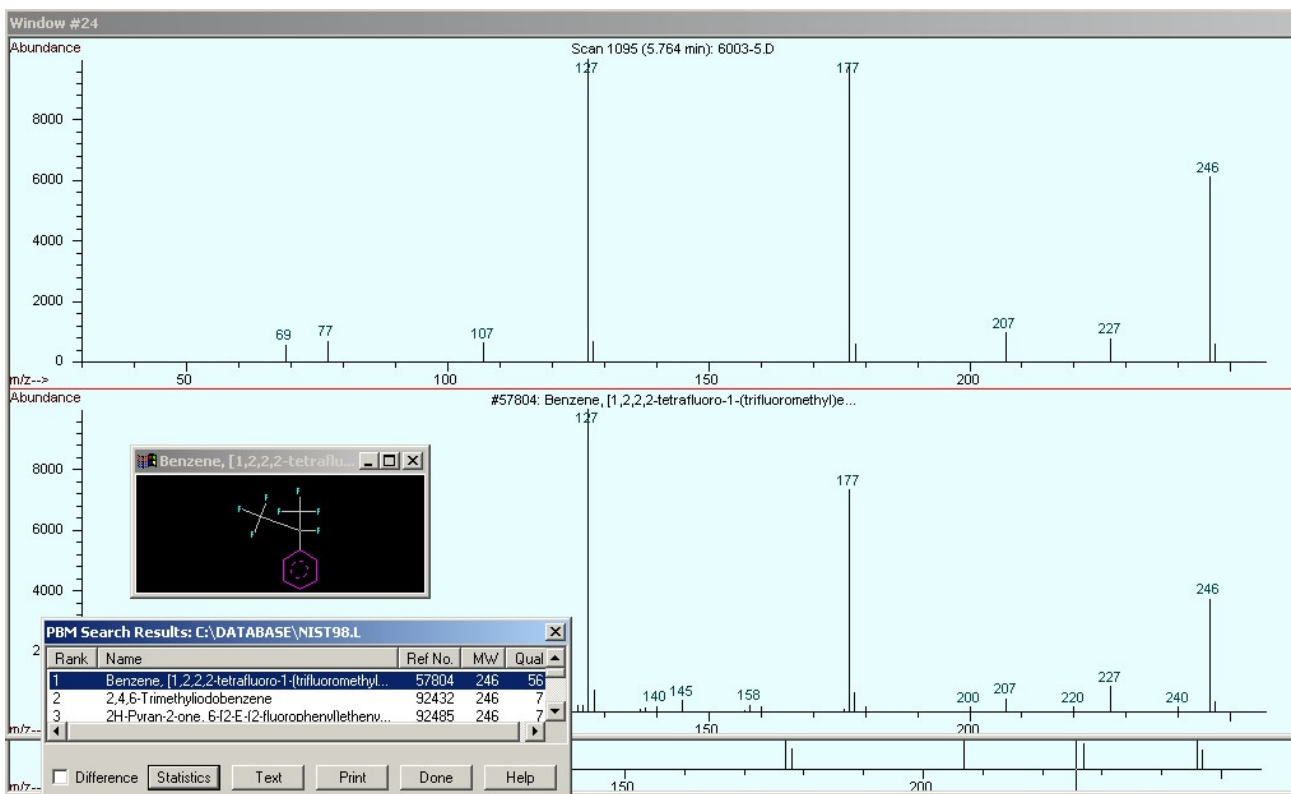

Mass spectrum at  $t_R = 2.732$  min

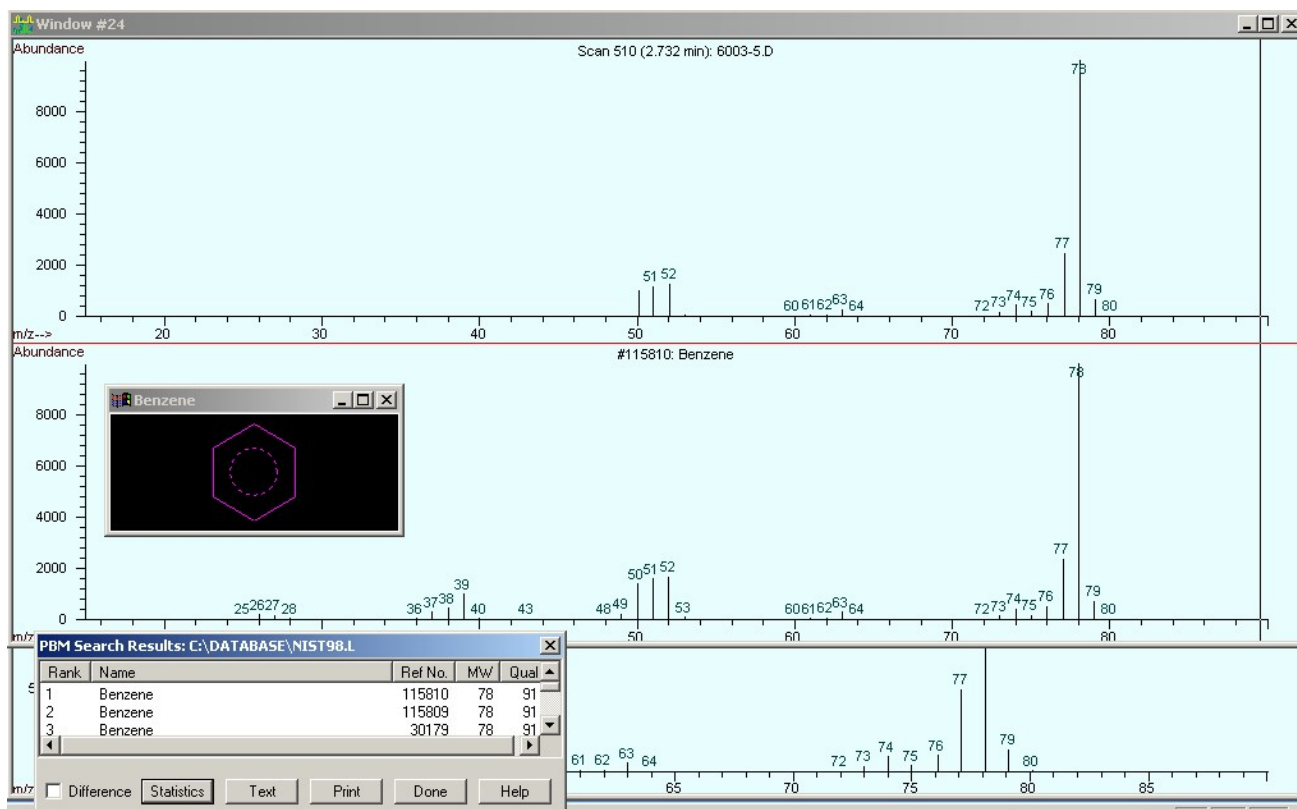

Supplement: d1dt01118a1.pdf [file d1dt01118a1.pdf]
